# Supplementary material for: Tgif1-deficiency impairs cytoskeletal architecture in osteoblasts by activating PAK3 signaling
Source: eLife. 2024 Apr 25;13:RP94265. doi: 10.7554/eLife.94265 (PMC11045221; doi:10.7554/eLife.94265)
Supplement: Figure 1—source data 1. [file elife-94265-fig1-data1.xlsx]

## Sheet: Fig 1D
	1h		2h		4h
	Tgif1+/+	Tgif1-/-	Tgif1+/+	Tgif1-/-	Tgif1+/+	Tgif1-/-
	1.06809	0.416555	0.976331	0.816568	1.0367	0.614679
	1.06275	0.309746	0.994083	0.795266	0.95107	0.681957
	0.94526	0.389853	1.02959	0.830769	0.972477	0.685015
	0.923899	0.416555	0.984496	0.748062	1.03976	0.691132
	0.933865	0.59179	1.03101	0.891473
	0.992018	0.629418	0.984496	0.856589
	1.07412	0.482326

## Sheet: Fig 1E
	1h		2h		4h
	Tgif1+/+	Tgif1-/-	Tgif1+/+	Tgif1-/-	Tgif1+/+	Tgif1-/-
	1.07514	1.31792	1.0596	1.13245	0.920188	0.57277
	1.04046	1.24855	0.960265	1.21854	1.1831	0.586854
	0.971098	1.23699	0.900662	1.2053	0.967136	0.661972
	0.913295	1.27168	1.07947	1.13245	0.929577	0.591549
	1.03579	0.513684	1.03497	0.79021	1.16575	0.651934
	0.917895	0.437895	1.11189	0.594406	0.867403	0.679558
	1.05263	0.378947	0.937063	0.776224	1.01105	0.674033
	0.993684	0.48	0.916084	0.552448	0.955801	0.657459
	0.97561	0.463415	0.903226	0.502781	1.07009	0.537019
	1.26016	0.495935	1.06785	0.489433	1.08588	0.584403
	0.837398	0.382114	0.965517	0.551724	0.991116	0.564659
	0.926829	0.504065	1.0634	1.2037	0.852912	0.556762
	1.03311	1.13907	1.09259	1.12037	1.33894	0.845938
	1.07285	0.794702	0.861111	1.02778	0.761905
	1.04636	0.900662	1.11111	0.611111	1.01401
	0.847682	0.913907	0.935185	0.501704	0.885154
	1.01278	0.576074	0.850716	0.460804
	1.04065	0.566783	1.08521	0.463531
	1.02207	0.543554	0.951602	0.447171
	0.924506	0.576074	1.11247

## Sheet: Fig 1F
	Tgif1+/+	Tgif1-/-
	0.986974	1.05335
	1.08197	0.775496
	1.40926	0.976201
	1.12702	1.49309
	0.836038	0.815951
	1.95869	0.893383
	0.774317	1.03596
	1.18297	1.35646
	1.20973	0.537758
	1.00386	1.14173
	1.16495	0.941469
	1.34821	0.686842
	0.847541	0.592072
	1.25866	1.03669
	1.20967	0.963296
	0.946856	0.960771
	0.808769	0.671075
	1.10206	1.34658
	0.843501	1.35663
	0.79418	0.688133
	1.33665	1.4836
	1.05274	1.4505
	1.13213	1.0878
	0.891924	0.668887
	0.831157	0.92284
	0.676406	1.08966
	0.833794	0.888838
	0.984113	1.09543
	0.863757	0.733525
	0.650202	0.640102
	0.819823	1.46699
	0.480582	1.13062
	0.910328	1.47844
	0.789972	0.894505
	0.735209	0.808993
	0.848102	0.97463
	0.881936	0.900845
	0.950559	0.855004
	1.23369	1.15233
	0.955833	0.854611
	1.37256	1.10228
	0.713719	1.03882
	0.961051	0.898489
	0.945228	0.75726
	1.15323	1.38502
	1.51373	0.912628
	1.60671	1.05302
	0.915546	1.09998
	1.27426	0.940291
	1.45993	1.0951
	0.986918	0.945621
	0.80602	1.06373
	1.11238	1.57972
	0.825377	0.685439
	1.19514	1.35876
	1.226	0.991575
	1.03276	0.614572
	0.913863	1.04095
	1.23515	0.75221
	0.947697	1.04567
	0.94708	0.886481
	0.966662	0.685888
	0.85405	1.05403
	1.8509	1.1952
	1.27751	1.08275
	0.97766	0.780377
	1.05846	0.839124
	0.919362	1.09796
	0.926937	1.12876
	0.94304	1.23924
	0.748395	0.50628
	1.14919	0.829474
	1.36156	1.31724
	1.20053	0.814212
	0.903202	1.1328
	1.6222	0.891307
	0.649753	0.789018
	1.11636	1.09274
	0.572041	0.817466
	0.795751	1.09274
	0.832784	0.67994
	0.751481	1.06031
	0.942255	0.952972
	0.66855	1.52479
	0.817354	1.44332
	0.79996	0.911731
	0.615526	0.883283
	0.614685	1.37851
	0.74284	1.12416
	1.19161	1.24289
	0.711474	1.17236
	0.935634	0.790982
	0.832616	0.745309
	0.821899	0.903763
	0.682578	0.928115
	0.724436	0.765845
	1.12399	0.757316
	1.20227	1.16333
	0.975808	1.16338
	1.7761	0.741886
	1.24542	1.04797
	0.86948	0.587078
	1.20704	0.800016
	0.738351	1.2829
	0.9165	1.13712
	0.791543	0.957909
	1.14689	0.769099
	1.11081	1.2159
	0.858763	1.04325
	0.895964	0.918015
	1.07978	0.876494
	1.13836	0.95544
	1.02333	0.623831
	1.38165	0.605931
	1.10172	1.07254
	0.715458	0.833682
	0.712653	1.02204
	0.808769	1.06805
	1.2393	0.68499
	0.756418	1.02687
	1.57501	0.986694
	1.27381	0.837497
	0.98574	0.769492
	1.01166	0.739305
	0.69307	1.25698
	0.660246	1.06906
	0.792217	1.01682
	0.640046	0.645208
	0.632584	0.878458
	0.750415	0.819991
	0.693968	1.30209
	0.996681	0.740708
	1.03585	0.817747
	0.985291	0.578269
	0.791319	0.714953
	0.889736	1.186
	0.831381	1.00325
	0.744747	0.888052
	0.844343	0.872734
	1.0772	0.985066
	1.21775	0.608961
	1.49931	0.744635
	1.34709	1.653
	1.23728	0.643132
	1.19424	0.67966
	0.627365	0.936419
	1.07467	1.03282
	1.26825	1.46346
	1.10531	0.745309
	0.912797	1.33009
	0.90814	0.88968
	1.27112	0.950559
	1.2053	0.617322
	1.141	0.998926
	0.860334	0.752883
	0.963689	0.911423
	0.831718	0.653751
	0.891026	0.895285
	0.975808	0.80551
	1.07052	0.714289
	1.07664	1.08507
	1.12125	0.944641
	0.774211	1.37097
	0.951082	1.03402
	0.731006	0.795741
	0.86887	0.722756
	0.830514	0.814593
	0.744032	0.997001
	0.955822	0.862538
	0.593757	0.825267
	0.776816	0.837426
	0.735493	0.530976
	0.739799	0.7745
	0.722141	0.955786
	0.934075	0.668696
	0.92597	1.13989
	1.40459	0.762125
	0.661169	0.75069
	1.03239	0.823024
	0.708933	0.799323
	0.868834	0.767082
	1.00377	1.11178
	1.75381	0.570599
	0.799757	0.726917
	0.905779	0.856097
	1.10863	0.807247
	0.978474	0.802254
	1.3498	0.609823
	0.719318	0.604576
	0.677778	0.75847
	0.877916	0.798165
	0.690226	0.712479
	1.29556	0.733503
	0.722973	0.56973
	0.662182	0.582612
	1.38212	0.729305
	0.825159	0.490341
	0.661205	0.482018
	1.28876	0.634175
	1.19909	0.787563
	0.838909	0.827945
	2.01546	0.890328
	1.28453	1.56369
	0.903029	0.988606
	1.08171	1.01962
	1.15831	0.894489
	0.894815	0.733466
	0.908384	0.663123
	1.2059	0.820165
	1.32386	0.676114
	1.01509	0.602912
	1.29118	0.550407
	0.620063	0.560358
	0.783691	0.782605
	0.657804	0.479304
	0.993889	0.642643
	1.13935	1.00985
	0.657334	0.760279
	1.69978	0.693736
	0.740523	0.713239
	0.714614	0.783257
	1.32332	0.732526
	0.784053	0.815823
	0.7965	1.07643
	0.695726	0.959115
	1.08562	1.24005
	0.763066	1.23452
	1.47797	0.496311
	0.623067	1.0186
	0.824363	0.665403
	0.730825	1.19949
	1.47522	0.619086
	1.0198	0.839669
	1.3151	0.677452
	0.948875	0.638988
	1.02056	0.754345
	1.07932	0.886745
	1.27389	1.04675
	0.91316	0.837751
	1.00919	0.691275
	1.52885	0.787925
	1.51936	0.717039
	1.1167	0.685666
	1.18701	0.669926
	0.814882	0.946197
	1.57411	0.826389
	0.733358	0.712479
	0.913703	0.761437
	0.808405	0.810576
	0.87589	0.846689
	1.38668	0.671699
	1.05421	0.633235
	1.04303	0.546717
	1.49418	0.574181
	0.795855	0.767516
	1.02019	0.769615
	0.64546	0.439067
	1.28193	0.67311
	1.21103	0.90567
	0.887044	0.915657
	0.580768	0.825846
	1.0835	0.768385
	0.457267	0.794329
	0.326694	0.586049
	1.32455	0.689538
	1.28623	0.624767
	1.30612	0.833011
	0.954313	0.567921
	0.604028	0.679587
	0.763939	0.838837
	0.89537	0.769326
	1.75691	0.6476
	0.755811	0.837751
	0.634623	0.810576
	0.993894	0.620461
	0.76004	0.883344
	0.767243	0.890617
	1.30387	0.870209
	1.23726	0.644162
	1.56059	0.574145
	1.78222	0.902956
	0.886516	0.718956
	0.881626	0.833156
	0.759115	1.12748
	1.47198	0.60302
	1.39711	0.670831
	1.67761	0.488857
	1.82735	0.555329
	1.51645	0.607218
	1.05944	0.942832
	1.71178	1.13266
	0.587178	1.03196
	1.29535	1.01064
	0.846274	0.69569
	1.35918	0.682989
	0.967198	0.870173
	1.17409	1.01828
	1.37464	0.67235
	0.708235	1.05428
	1.0866	0.884502
	0.958476	0.589559
	0.985634	0.666271
	0.565967	0.790566
	0.687155	0.817234
	1.00149	1.12868
	0.740481	0.649301
	0.816802	1.10679
	0.722375	0.988352
	0.723036	0.891015
	0.626429	0.952819
	0.893256	0.811879
	0.735063	0.779747
	0.856978	0.876216
	0.71286	1.02016
	1.23548	0.706183
	0.859159	1.02182
	1.23052	1.33569
	1.13748	1.063
	0.755018	1.2051
	1.10914	0.793931
	1.52999	0.543098
	1.05713	1.00207
	0.798631	0.644379
	1.28821	0.742115
	0.796516	0.703578
	0.488324	0.839199
	0.814291	1.26184
	0.738234	0.391518
	0.884533	0.749402
	0.506826	0.817926
	0.87515	1.35098
	0.956427	0.720063
	0.936207	0.947639
	1.10656	0.744049
	0.840326	1.44442
	0.427068	0.871384
	0.63905	1.16411
	1.03665	0.959599
	1.04966	1.26825
	1.13762	0.873366
	0.954181	0.863983
	1.08079	1.10742
	0.984246	1.17099
	0.58698	1.16907
	0.811648	1.14806
	0.572707	0.685107
	1.24407	0.690195
	1.10451	0.925304
	0.974995	0.70949
	1.04874	0.426804
	0.762287	0.777221
	1.01121	1.23488
	1.27275	0.623257
	1.11198	1.0461
	1.33281	1.41013
	1.17839	0.838014
	1.48962	1.14812
	1.28021	0.889225
	1.88048	1.13438
	0.702552	1.21281
	1.37847	1.30242
	1.45519	1.20799
	1.17845	0.975392
	0.856582	1.01834
	0.789313	1.62184
	1.34821	1.12982
	1.81592	1.42598
	0.969247	1.2853
	0.842837	0.87634
	0.872044	1.1211
	0.938718	0.838807
	1.27268	0.897617
	0.677244	0.764336
	1.38171	0.767441
	1.10088	0.777882
	0.530152	0.730437
	0.643279	0.978035
	1.24447	1.06301
	1.1544	1.14845
	0.580372	1.01451
	0.826516	0.676913
	0.341364	1.24255
	0.621209	1.06407
	0.808542	1.42473
	0.669182	1.64656
	1.3161	1.39526
	0.787331	1.03209
	0.754292	1.54215
	1.38951	0.702816
	1.59343	1.14184
	0.827639	0.985634
	1.03797	1.01722
	1.05621	1.08436
	0.601451	1.41931
	1.12929	1.0087
	0.572316	1.09731
	0.909967	1.10947
	0.565097	1.39453
	1.07906	0.92385
	1.04604	0.729512
	1.00255	1.10464
	1.42754	0.967132
	0.810229	0.977374
	0.489242	0.780525
	1.22259	0.965017
	0.753503	0.946119
	0.591024	0.668125
	0.360269	0.995348
	0.626395	1.03361
	1.00026	1.66856
	0.588798	1.12579
	0.662428	1.12969
	0.884581	0.982661
	1.4732	0.736913
	1.42772	1.08951
	1.04411	1.1622
	1.13537	1.28887
	1.2783	1.70021
	0.933307	1.41085
	0.960677	1.19973
	1.33653	0.77134
	1.21525	0.832926
	1.09452	0.66601
	0.841811	0.844291
	1.15053	0.758322
	0.906177	0.649358
	0.769023	0.886648
	0.872671	1.07491
	0.912253	0.57416
	1.67731	0.575614
	0.797777	0.698323
	0.592949	0.737441
	1.63965	1.02251
	0.776182	1.25755
	0.621403	1.12248
	1.06198	1.19616
	1.37882	1.14925
	1.49287	1.09354
	1.20009	1.26786
	1.39993	1.26323
	1.18187	1.60678
	0.978664	1.37775
	1.13717	1.07603
	1.10216	0.836626
	1.00838	1.08376
	0.806079	0.726472
	0.649495	0.8433
	0.959354	1.31345
	0.836818	1.23336
	0.68264	1.19451
	1.33069	0.783829
	0.906538	0.798631
	0.804816	1.12017
	0.977882	0.854335
	1.55778	1.06077
	0.549036	1.53105
	0.916524	0.899731
	1.22277	1.81308
	0.77149	1.25226
	1.63574	1.1129
	0.977701	0.849445
	0.936315	1.09176
	1.21808	1.04729
	1.28227	0.474051
	0.842593	0.509932
	1.14174	0.618301
	0.879949	0.590019
	1.17585	1.26885
	1.17116	0.377047
	0.899259	1.03533
	0.813117	0.926229
	1.04862	0.810327
	0.931201	0.832992
	1.14559	0.991515
	1.116	0.563522
	0.790559	0.451518
	1.0227	1.19669
	1.00621	0.939643
	1.40962	0.690525
	0.904553	1.08429
	1.18139	0.931317
	0.921938	1.20647
	1.00994	0.915789
	0.885844	1.24876
	0.468488	1.53811
	0.593972	0.975596
	0.932525	1.20419
	0.958933
	1.8088	1.19179
	0.74845	1.03214
	0.950331	0.844157
	0.947624	0.929577
	1.49486	0.755007
	1.43831	0.760541
	0.857451	0.682941
	1.20635	0.978544
	1.12153	0.963986
	0.89974	0.816967
	1.39361	0.959595
	1.12941	1.00874
	0.595957	0.629704
	1.10421	0.94227
	0.820696	1.03792
	0.882596	1.05019
	0.882716	0.981852
	1.05019	0.67861
	0.799823	1.188
	1.32287	0.797356
	0.858534	0.842593
	0.791822	1.14656
	1.1089	0.523109
	1.10144	0.774557
	1.07214	0.91899
	0.933728	1.5419
	1.00261	1.2191
	0.781535	1.72856
	0.896973	1.30164
	0.752721	1.06751
	0.979747
		0.86846
		1.10595
		0.901665
		1.09705
		0.965009
		1.28858
		1.51194
		0.930299
		1.14144
		0.858053
		1.35638
		1.25736
		0.790438
		1.05993
		1.04453
		1.39764
		1.58262
		1.20978
		1.19396
		0.875017
		1.13374
		0.641675
		0.641133
		0.513063
		1.4951
		1.19191
		1.31258
		0.911952
		1.23288
		1.21519
		1.21826
		0.747428
		1.04273
		1.80652
		1.60957
		1.03725
		1.40733
		1.31144
		1.45058
		1.00152
		0.533756
		0.553247
		0.558601
		0.902086
		0.427703
		1.49221
		0.642336
		0.578091
		0.931863
		0.73269
		1.41623
		0.801808
		1.05765
		0.968738
		0.921998
		0.718854
		0.715906
		0.874475
		1.03437
		0.94606
		1.4575
		1.0861
		0.916644
		1.06529
		1.1391
		1.02805
		1.31944
		0.760481
		1.16394
		1.17044
		0.842172
		1.2552
		0.808064
		0.715245
		0.438651
		1.28612
		0.603837
		1.31902
		0.518958
		0.773896
		0.812997
		0.739968
		0.695153
		1.27409
		0.82972
		0.844398

## Sheet: Fig 1G
	Tgif1+/+	Tgif1-/-
	0.985818	1.05315
	1.08278	0.775725
	1.4087	0.975044
	1.12588	1.49219
	0.834982	0.816128
	1.95817	0.894239
	0.775725	1.03699
	1.18244	1.35752
	1.20938	0.538698
	1.00467	1.14204
	1.16628	0.942722
	1.34944	0.68684
	0.84845	0.592568
	1.25786	1.03699
	1.20938	0.96427
	0.948109	0.961576
	0.808047	0.670679
	1.10164	1.34675
	0.843063	1.35752
	0.79458	0.689534
	1.33597	1.48411
	1.05315	1.45179
	1.13127	1.08817
	0.891545	0.667986
	0.832289	0.923867
	0.676066	1.09086
	0.834982	0.888852
	0.983124	1.09625
	0.864611	0.732629
	0.649131	0.641051
	0.818821	1.46795
	0.479441	1.13127
	0.9104	1.47873
	0.789193	0.894239
	0.735323	0.808047
	0.84845	0.975044
	0.880771	0.899626
	0.950802	0.853837
	1.23362	1.15281
	0.956189	0.853837
	1.37368	1.10164
	0.713775	1.03969
	0.961576	0.899626
	0.945415	0.756871
	1.15281	1.38445
	1.51374	0.913093
	1.60801	1.05315
	0.915787	1.09894
	1.27402	0.940028
	1.45987	1.09625
	0.985818	0.945415
	0.805354	1.06393
	1.11241	1.58108
	0.824208	0.68684
	1.19591	1.36021
	1.22554	0.991205
	1.03161	0.614116
	0.913093	1.04238
	1.23631	0.751484
	0.948109	1.04507
	0.948109	0.886158
	0.966963	0.68684
	0.853837	1.05315
	1.85043	1.19591
	1.27671	1.08278
	0.977737	0.781112
	1.05854	0.840369
	0.91848	1.09894
	0.926561	1.12857
	0.942722	1.23901
	0.74879	0.506376
	1.15012	0.829595
	1.36291	1.31712
	1.2013	0.813434
	0.902319	1.13396
	1.62148	0.891545
	0.649131	0.789193
	1.1178	1.09356
	0.57102	0.818821
	0.79458	1.09356
	0.832289	0.67876
	0.751484	1.06124
	0.942722	0.953496
	0.667986	1.52452
	0.818821	1.44371
	0.799967	0.913093
	0.616809	0.883465
	0.614116	1.37907
	0.743403	1.12319
	1.19052	1.24439
	0.711082	1.17167
	0.934641	0.791886
	0.832289	0.746097
	0.821515	0.905013
	0.681453	0.929254
	0.724549	0.764951
	1.12319	0.756871
	1.2013	1.16359
	0.975044	1.16359
	1.77501	0.74071
	1.24439	1.04777
	0.869998	0.587181
	1.20668	0.799967
	0.738016	1.2821
	0.915787	1.13665
	0.791886	0.958883
	1.14743	0.770338
	1.10972	1.21476
	0.859224	1.04238
	0.896932	0.91848
	1.08009	0.875384
	1.13935	0.956189
	1.02353	0.62489
	1.38176	0.606035
	1.10164	1.07201
	0.716469	0.834982
	0.713775	1.02353
	0.808047	1.06932
	1.23901	0.684147
	0.756871	1.02622
	1.57569	0.985818
	1.27402	0.837676
	0.985818	0.770338
	1.01275	0.74071
	0.692227	1.25786
	0.659905	1.06932
	0.791886	1.01814
	0.641051	0.646438
	0.63297	0.878078
	0.751484	0.818821
	0.694921	1.30096
	0.996592	0.74071
	1.03699	0.818821
	0.985818	0.579101
	0.791886	0.713775
	0.888852	1.18514
	0.832289	1.00467
	0.746097	0.888852
	0.845756	0.872691
	1.0774	0.985818
	1.21746	0.608729
	1.50027	0.743403
	1.34675	1.6538
	1.23631	0.643744
	1.19322	0.67876
	0.627583	0.937335
	1.0747	1.03161
	1.26863	1.46257
	1.10433	0.746097
	0.913093	1.33058
	0.907706	0.888852
	1.27133	0.950802
	1.20668	0.616809
	1.14204	0.999285
	0.859224	0.754177
	0.96427	0.910842
	0.832289	0.65343
	0.891545	0.895991
	0.975044	0.805237
	1.06932	0.714483
	1.0774	1.08575
	1.12049	0.943844
	0.773886	1.37121
	0.950444	1.0346
	0.730984	0.795337
	0.86959	0.722733
	0.829988	0.815138
	0.744184	0.996646
	0.955394	0.86299
	0.594027	0.825038
	0.777186	0.838239
	0.735934	0.531325
	0.739234	0.773886
	0.722733	0.955394
	0.933943	0.668281
	0.925693	1.1402
	1.40421	0.762335
	0.661681	0.750785
	1.03295	0.823388
	0.709533	0.798637
	0.86959	0.767285
	1.00325	1.11215
	1.74908	0.570926
	0.800287	0.727684
	0.905892	0.85639
	1.10885	0.806887
	0.978495	0.801937
	1.34976	0.610528
	0.719433	0.603928
	0.678181	0.759035
	0.877841	0.798637
	0.689732	0.712833
	1.29531	0.734284
	0.722733	0.569276
	0.661681	0.582477
	1.38276	0.729334
	0.825038	0.490073
	0.661681	0.481822
	1.28871	0.633629
	1.19961	0.787086
	0.838239	0.828338
	2.01309	0.891041
	1.28376	1.56427
	0.902592	0.988396
	1.08245	1.01975
	1.15835	0.894341
	0.894341	0.734284
	0.909192	0.663331
	1.20621	0.820088
	1.32336	0.676531
	1.0148	0.602278
	1.29201	0.551125
	0.620429	0.561026
	0.783786	0.782136
	0.65838	0.478522
	0.993346	0.64188
	1.1402	1.00985
	0.65673	0.760685
	1.69958	0.693032
	0.740884	0.712833
	0.714483	0.783786
	1.32336	0.732634
	0.783786	0.815138
	0.796987	1.07585
	0.696332	0.958694
	1.08575	1.24086
	0.762335	1.23426
	1.47847	0.496673
	0.623729	1.0181
	0.825038	0.664981
	0.730984	1.19961
	1.47517	0.618779
	1.01975	0.839889
	1.31511	0.678181
	0.948794	0.638579
	1.0214	0.754085
	1.07915	0.886091
	1.27386	1.04615
	0.912492	0.838239
	1.00985	0.691382
	1.52962	0.788736
	1.51972	0.717783
	1.1171	0.686432
	1.1864	0.669931
	0.815138	0.945494
	1.57417	0.826688
	0.732634	0.712833
	0.914142	0.760685
	0.808537	0.810187
	0.87619	0.846489
	1.38606	0.671581
	1.0544	0.633629
	1.04285	0.546175
	1.49497	0.574227
	0.796679	0.767285
	1.01951	0.768936
	0.644059	0.43892
	1.28201	0.673231
	1.21181	0.905892
	0.888251	0.915792
	0.579958	0.826688
	1.08361	0.768936
	0.457862	0.793687
	0.326608	0.585777
	1.32475	0.689732
	1.28506	0.625379
	1.30643	0.833288
	0.955404	0.567626
	0.604377	0.679831
	0.763103	0.838239
	0.894356	0.768936
	1.75514	0.64683
	0.756998	0.838239
	0.634901	0.810187
	0.995086	0.620429
	0.76005	0.882791
	0.766155	0.891041
	1.30338	0.86959
	1.23623	0.64353
	1.55978	0.574227
	1.78261	0.902592
	0.885199	0.719433
	0.882147	0.833288
	0.76005	1.127
	1.47126	0.602278
	1.398	0.671581
	1.67883	0.488423
	1.82839	0.556076
	1.51705	0.607228
	1.05919	0.942194
	1.7124	1.13195
	0.586063	1.0313
	1.29422	1.00985
	0.845518	0.696332
	1.35832	0.683132
	0.967614	0.86959
	1.17518	1.0181
	1.37358	0.671581
	0.708159	1.0544
	1.08666	0.884441
	0.958457	0.589077
	0.985929	0.666631
	0.564696	0.790387
	0.686792	0.816788
	1.00119	1.12865
	0.741736	0.65013
	0.818046	1.1072
	0.723421	0.988396
	0.723421	0.891041
	0.625744	0.952094
	0.894356	0.811837
	0.735631	0.780486
	0.857727	0.87619
	0.711212	1.01975
	1.23623	0.706233
	0.857727	1.0214
	1.23012	1.33491
	1.13855	1.06265
	0.753945	1.20456
	1.10803	0.793687
	1.52926	0.542875
	1.05613	1.0016
	0.799732	0.64518
	1.28812	0.742534
	0.796679	0.702932
	0.488386	0.839889
	0.814994	1.26231
	0.738683	0.390709
	0.885199	0.747841
	0.5067	0.818046
	0.876042	1.35222
	0.955404	0.720369
	0.93709	0.946247
	1.10497	0.744788
	0.839413	1.44379
	0.427337	0.869937
	0.637954	1.16297
	1.03782	0.958457
	1.05003	1.26675
	1.13855	0.872989
	0.955404	0.863832
	1.08055	1.10803
	0.982876	1.17213
	0.586063	1.16907
	0.811941	1.14771
	0.573853	0.68374
	1.24233	0.689845
	1.10497	0.92488
	0.973719	0.708159
	1.05003	0.427337
	0.763103	0.778365
	1.01035	1.23317
	1.27286	0.622692
	1.11108	1.04698
	1.3339	1.41021
	1.17823	0.83636
	1.48958	1.14771
	1.27896	0.888251
	1.88028	1.1355
	0.702054	1.21181
	1.37969	1.30338
	1.456	1.20875
	1.17823	0.973719
	0.857727	1.01951
	0.790574	1.62083
	1.34917	1.12939
	1.81618	1.42548
	0.967614	1.28506
	0.842465	0.876042
	0.872989	1.12023
	0.93709	0.839413
	1.27286	0.897409
	0.677635	0.763103
	1.38274	0.766155
	1.10192	0.778365
	0.531119	0.729526
	0.644059	0.976771
	1.24538	1.06224
	1.15381	1.14771
	0.579958	1.0134
	0.827203	0.677635
	0.34187	1.24233
	0.619639	1.06529
	0.808889	1.42548
	0.668478	1.64525
	1.31559	1.39495
	0.787522	1.03171
	0.753945	1.54147
	1.38885	0.702054
	1.59336	1.1416
	0.827203	0.985929
	1.03782	1.01645
	1.05613	1.08361
	0.601325	1.41937
	1.12939	1.0073
	0.573163	1.09582
	0.909647	1.10803
	0.564608	1.39495
	1.07789	0.92488
	1.04652	0.729526
	1.00375	1.10497
	1.42863	0.967614
	0.809842	0.976771
	0.490468	0.781417
	1.22332	0.964562
	0.752811	0.946247
	0.590273	0.668478
	0.359296	0.995086
	0.627343	1.03477
	1.0009	1.66967
	0.587421	1.12634
	0.661561	1.12939
	0.883983	0.982876
	1.47426	0.735631
	1.42863	1.08971
	1.04367	1.16297
	1.13492	1.28812
	1.2775	1.70019
	0.932459	1.41021
	0.960975	1.1996
	1.33738	0.77226
	1.21476	0.833308
	1.095	0.665426
	0.84121	0.845518
	1.15203	0.756998
	0.906795	0.650163
	0.769921	0.885199
	0.872577	1.07445
	0.912499	0.573853
	1.67672	0.576906
	0.798436	0.699002
	0.593124	0.738683
	1.63965	1.02256
	0.775624	1.25759
	0.62164	1.12329
	1.06078	1.19654
	1.38015	1.14771
	1.49422	1.09276
	1.20051	1.26675
	1.40011	1.2637
	1.18055	1.60557
	0.978084	1.37664
	1.13777	1.07445
	1.10355	0.83636
	1.00945	1.08361
	0.806991	0.726474
	0.650155	0.842465
	0.958123	1.31254
	0.835507	1.23317
	0.681522	1.19349
	1.33168	0.78447
	0.906795	0.799732
	0.804139	1.12023
	0.978084	0.854675
	1.55695	1.05919
	0.550351	1.52926
	0.91535	0.900461
	1.22332	1.81313
	0.772772	1.25149
	1.63679	1.11413
	0.978084	0.84857
	0.935311	1.09276
	1.21762	1.04698
	1.2832	0.473124
	0.84121	0.509753
	1.14062	0.619639
	0.881131	0.589115
	1.17484	1.2698
	1.17199	0.375447
	0.898241	1.03477
	0.812694	0.92488
	1.04937	0.808889
	0.932459	0.833308
	1.14633	0.992033
	1.11496	0.564696
	0.789882	0.451757
	1.02371	1.19654
	1.0066	0.940142
	1.40867	0.689845
	0.903944	1.08361
	1.18055	0.930985
	0.921053	1.2057
	1.00945	0.915723
	0.886835	1.24898
	0.467656	1.53699
	0.593124	0.975233
	0.932459	1.20336
	0.958123
	1.80789	1.19195
	0.747108	1.03226
	0.949569	0.844061
	0.946717	0.929608
	1.49422	0.755663
	1.43719	0.761366
	0.858319	0.684374
	1.20621	0.978084
	1.12066	0.963827
	0.901092	0.818397
	1.39441	0.960975
	1.12922	1.00945
	0.595976	0.630194
	1.10355	0.941014
	0.821249	1.03797
	0.883983	1.04937
	0.883983	0.980936
	1.04937	0.678671
	0.798436	1.1891
	1.32312	0.798436
	0.858319	0.84121
	0.792733	1.14633
	1.10926	0.521835
	1.1007	0.775624
	1.07219	0.918202
	0.932459	1.54269
	1.00375	1.22047
	0.781327	1.72804
	0.898241	1.30031
	0.752811	1.06648
	0.980936
		0.869725
		1.1064
		0.901092
		1.09785
		0.963827
		1.2889
		1.51133
		0.929608
		1.14062
		0.858319
		1.35734
		1.25754
		0.789882
		1.06078
		1.04367
		1.39726
		1.58261
		1.20906
		1.1948
		0.875428
		1.13492
		0.641601
		0.641601
		0.51328
		1.49422
		1.19195
		1.31172
		0.912499
		1.23187
		1.21476
		1.21762
		0.747108
		1.04367
		1.80789
		1.60828
		1.03797
		1.40867
		1.31172
		1.45144
		1.0009
		0.533241
		0.553202
		0.558905
		0.901092
		0.427734
		1.49136
		0.641601
		0.578866
		0.932459
		0.73285
		1.41722
		0.801288
		1.05793
		0.96953
		0.921053
		0.718593
		0.715741
		0.875428
		1.03512
		0.946717
		1.45715
		1.08644
		0.91535
		1.06648
		1.13777
		1.02941
		1.32027
		0.761366
		1.16344
		1.16914
		0.84121
		1.25469
		0.806991
		0.715741
		0.43914
		1.28605
		0.60453
		1.32027
		0.518984
		0.772772
		0.812694
		0.741405
		0.69578
		1.27465
		0.829803
		0.844061

## Sheet: Fig 1H
	Tgif1+/+	Tgif1-/-
	0.226292	0.912981
	1.12048	1.40853
	0.922746	0.720132
	1.14245	1.09607
	0.678633	0.768955
	0.41255	1.25962
	0.969127	0.966686
	0.656663	0.75919
	1.19371	1.27915
	0.573665	1.15709
	0.168194	0.283171
	1.09851	1.44515
	1.36703	1.32309
	0.986215	0.790925
	0.444285	1.05457
	0.91054	0.356404
	1.24986	1.19127
	1.23765	1.01551
	1.33041	1.11071
	0.954481	0.207496
	1.04724	1.03748
	1.31821	0.900776
	0.768955	0.580988
	0.351522	1.00086
	1.41829	1.08386
	1.52082	1.23765
	0.778719	0.712809
	1.31089	0.0651781
	1.28403	1.22789
	1.81132	1.02771
	1.08386	0.583429
	0.561459	0.722573
	0.754308	0.944716
	1.42806	1.02771
	0.959363	0.725015
	0.93251	1.05213
	1.06433	0.683515
	0.568783	0.983774
	0.981333	0.812895
	0.981333	1.01063
	1.35483	0.966686
	1.5135	0.937393
	0.771396	1.10583
	1.33041	1.09851
	0.598076	0.578547
	0.410109	1.00086
	0.106921	0.685957
	0.683515	1.22789
	1.13024	1.18151
	1.11804	0.51996
	0.881247	0.978892
	1.09607	0.790925
	1.09362	0.793366
	0.810454	1.35238
	0.278288	0.783602
	0.578547	1.36459
	1.44026	1.54767
	1.3353	0.659104
	1.47444	1.34994
	1.10827	0.729897
	0.742102	1.02527
	0.493108	0.778719
	0.793366	0.607841
	1.23765	0.322229
	1.28403	0.817777
	0.956922	1.2645
	0.688398	1.2523
	0.69328	1.02527
	0.939834	0.930069
	0.920305	0.590753
	1.35483	1.35727
	1.11071	1.5135
	1.46956	1.57941
	1.04724	1.06433
	1.02771	1.12536
	0.166973	1.02527
	1.36215	0.922746
	0.725015	0.961804
	1.96022	0.803131
	0.905658	0.869041
	1.02527	1.24742
	1.02039	0.915423
	1.02527	0.869041
	1.34018	1.27427
	1.14489	0.688398
	1.2938	1.0033
	1.29136	0.524842
	1.39632	0.908099
	0.805572	1.25474
	1.64532	0.317346
	1.35971	0.908099
	1.07654	1.42074
	1.18395	1.40121
	1.17174	0.773837
	0.939834	0.393021
	0.944716	1.10095
	0.768955	1.30112
	0.978892	0.67131
	1.17174	0.554136
	0.363728	1.10827
	0.629811	1.60626
	0.991097	0.849512
	0.768955	0.729897
	1.11071	0.28073
	0.793366	0.749426
	0.69328	1.06189
	0.99598	1.52815
	0.969127	1.36947
	0.881247	0.771396
	0.610282	1.25474
	0.837306	1.37924
	0.771396	0.361287
	1.08142	1.60382
	0.659104	1.51838
	1.26939	1.83329
	0.912981	1.7747
	0.983774	1.06677
	0.725015	0.776278
	0.414992	1.72344
	1.39144	0.954481
	1.54035	1.13512
	1.38168	1.40121
	0.837306	0.864159
	1.08874	0.983774
	0.705486	1.19859
	0.778719	1.09607
	1.41829	1.24253
	1.05945	1.81864
	1.54523	1.21568
	1.47444	1.24986
	0.656663	0.524842
	0.917864	1.25474
	1.10095	1.11071
	0.893452	1.31089
	1.2523	1.00819
	0.341758	1.06189
	1.25474	0.859277
	1.35238	1.29868
	1.30356	1.12292
	1.07898	1.10095
	1.42806	1.24253
	0.876364	1.20592
	0.805572	0.64934
	0.986215	1.27183
	1.17906	1.83573
	1.00819	1.01307
	1.02527	1.555
	0.69328	0.512637
	1.10095	1.03504
	0.920305	0.463814
	0.781161	1.17174
	1.57941	1.11071
	1.13512	1.2938
	1.35483	1.89187
	1.09607	0.891011
	1.34506	1.14009
	0.817777	1.43485
	1.0326	0.986615
	1.13757	0.701593
	0.739661	1.14252
	0.725015	0.811217
	1.24986	1.19125
	0.601713	1.38613
	0.97687	0.86481
	1.01585	1.09624
	0.686976	1.53473
	0.406826	1.0597
	1.23997	0.911096
	0.940329	1.03777
	1.41537	0.816089
	1.44947	1.15958
	1.51768	2.16081
	0.652871	0.716209
	0.984179	1.04021
	0.962254	1.1815
	1.37639	0.981743
	0.589533	1.42511
	1.15958	1.42024
	1.0061	0.730826
	0.903788	1.09624
	0.828269	1.18637
	0.789292	1.43729
	1.03777	1.48601
	1.23022	1.40562
	1.74911	1.00367
	0.601713	1.20099
	0.743006	1.71257
	0.613894	1.51281
	1.34472	1.58589
	1.26676	1.60538
	0.499398	1.42998
	1.21317	1.51037
	1.0597	1.53473
	1.46409	1.75642
	1.50306	1.41537
	1.05726	1.50063
	1.1815	1.92451
	1.10111	1.61025
	0.618766	1.56884
	0.764931	1.7077
	1.1547	1.22779
	0.294766	1.0329
	0.835577	0.496962
	1.22535	1.2424
	0.913532	1.30574
	0.499398	1.13522
	0.957382	1.30574
	1.5323	0.718645
	0.989051	1.39831
	1.34228	1.71988
	0.499398	1.52012
	0.906224	1.4178
	0.62851	1.54448
	1.19855	1.20343
	1.23022	1.78809
	0.886735	1.37639
	0.881863	1.01098
	0.967126	1.40319
	0.609021	1.25458
	1.41293	1.23997
	1.1474	1.51037
	1.18881	1.31305
	0.969562	1.04264
	0.869683	0.689412
	0.808781	1.33985
	0.701593	1.23753
	0.757623	0.801472
	0.903788	1.58346
	1.40806	1.61512
	1.48114	1.49332
	1.16445	0.901352
	1.60538	1.52255
	0.108406	1.32036
	1.05483	1.34472
	1.68334	1.26189
	0.991487	0.991487
	0.645563	1.07919
	0.915968	0.918404
	0.477473	0.945201
	1.78078	1.35446
	0.633382	1.41049
	0.606585	1.25946
	0.89648	1.72718
	0.565172	0.940329
	1.15714	1.11816
	0.494525	1.13278
	0.825833	1.50306
	1.02803	1.35203
	1.21073	1.57858
	1.02559	1.37882
	1.58833	1.37639
	1.24971	1.52012
	0.891607	1.63949
	1.64436	1.00854
	0.924901	1.44216
	0.792773	1.6541
	0.513834	1.98541
	0.419387	1.63218
	0.611707	0.825833
	0.327875	1.29113
	0.939582	0.613894
	0.461961	1.56397
	1.12554	1.13278
	0.817241	1.39831
	1.04235	1.38613
	1.35554	1.6541
	1.94278	1.14252
	2.30002	1.70282
	2.12385	1.63949
		1.67846
	0.675325	1.37395
	1.14022	1.54691
	0.94937	1.32036
	0.690006	1.26189
	1.83023	1.37639
	1.41916	1.05726
	0.533409	1.12304
	0.476642	1.47383
	0.592133	1.55666
	1.02767	1.30331
	1.56108	0.850194
	0.27013	1.37395
	0.861284	1.38857
	0.645963	1.10598
	1.24299	1.48845
	1.89874	1.38613
	0.264258	1.7418
	0.225108	1.55179
	0.411557	1.59807
	0.675325	1.30331
	0.0983625	0.891607
	0.24664	1.08162
	0.597026	1.03777
	1.2332	1.14252
	0.388067	1.16201
	0.24664	1.09137
	0.208959	1.20586
	0.915114	1.13522
	1.43874	0.847758
	0.298513	1.06944
	0.871071	1.58589
	0.582345	1.27407
	0.336684	1.04508
	1.8547	0.78442
	0.670431	0.704029
	0.641069	1.21561
	0.714474	1.2692
	1.09618	0.764931
	0.895539	1.07431
	2.75024	0.901352
		1.13034
	1.03256	1.94643
	1.0815	1.54935
	1.21363	0.957382
	0.983625	1.69552
	1.5415	1.55666
		1.8563
	0.543196	1.17663
	1.62959	1.14496
	1.09618	1.39831
	0.606814	1.73693
	0.314173	1.15714
	0.227066	0.830705
	0.577452	1.53473
	1.24788	1.27651
	1.41427	1.20099
	0.130661	0.998795
	0.448259	0.572558
	2.50555	0.273556
	0.699793	1.30661
	0.626388	0.102767
	1.24788	0.147788
	1.53661	0.606814
	0.433089	0.0959157
	0.85639	0.983625
	0.567664	1.91342
	0.518728	1.56108
	0.0513834	0.157086
	0.128214	0.417429
	0.993413	0.998306
	0.704687	0.758517
	0.266215	0.279917
	0.704687	0.557877
	1.04235	0.70958
	1.75682	0.621495
	0.302917	1.11086
	0.543196	0.660644
	0.528515	0.50894
	0.714474	0.680219
	2.12874	1.44852
	0.934689	1.34576
	0.690006	0.109129
	0.415961	3.07811
	0.391003	0.132618
	0.758517	1.64916
	0.543196	0.234406
	0.405195	1.63448
	1.37022	0.110597
	1.63448	0.841709
	0.895539	0.518728
	0.778092	1.64916
		1.88406
		2.393
	0.425748	0.418408
	0.988519	1.05214
	0.265236	0.405684
	1.57576	0.468323
	0.577452	0.368003
	0.504047	1.14512
	0.2853	0.50894
	1.05214	0.773198
	0.16981	0.954263
	0.954263	1.00809
	1.12554	0.286279
		0.753623
	0.812347	0.0650857
	0.631282	2.53492
	2.02108	1.26746
	1.0766	0.831922
	0.246151	0.900433
	0.513834	1.17937
	0.60192	0.257896
	0.38562	0.40862
	2.02108	0.743836
	2.06512	1.9281
	0.567664	0.187916
	0.258385	0.185959
	0.395897	1.1598
	2.44683	0.915114
	2.56428	0.900433
	1.30661	0.80256
	2.59853	0.54809
	1.2381	0.329833
	0.392471	2.18747
	1.10107	0.351365
		0.797666
	0.737365	0.836816
	1.04893	1.53661
	0.222767	0.528515
	2.28999	0.861284
	1.73956	0.743836
	0.0685438	2.4664
	0.825641	0.195257
	2.53404	1.06682
	0.602355	1.39959
	1.15797	0.213853
	1.10086	0.944476
	0.1428	2.35385
	0.628318	2.19725
	1.62532	1.27235
	1.21509	1.27235
	1.24625	0.606814
	2.58597	0.792773
	0.0664667	0.523621
	0.304293	0.446302
	1.994	1.03746
	0.628318	0.12381
	0.326102	1.76172
	0.315717	1.36533
	0.732172	0.337662
	1.44877	0.538302
	0.0685438	1.83023
		0.65575
	0.338046	0.924901
	0.66986	1.37512
	1.07489	0.866178
	1.65648	0.621495
	0.212901	0.978732
	1.18394	1.13044
	0.576391	0.592133
	1.30856	0.275024
	1.33972	2.57406
	0.752943	0.680219
	0.586777	0.724261
	0.716594	1.27724
	0.452805	0.400301
	0.768521	1.1549
	0.695823	0.890646
	0.758136	0.836816
	0.877568	0.74873
	0.960652	0.978732
	0.34947	1.73725
	1.24625	0.110597
	0.7841	1.15001
	0.450208	0.202597
	1.60974	1.68342
	0.226922	0.959157
	0.19213	0.322981
	0.924303	1.2381
	1.97323	1.11575
	0.721787	1.05703
	0.432553	0.513834
	1.45396	0.641069
	2.24325	0.895539
	2.52885	0.523621
	0.566006	0.660644
	0.877568	0.841709
	1.51627	1.14022
	0.747751	0.880859
	0.758136	0.988519
	0.179149	0.65575
	2.25883	1.25767
	2.21729	2.17278
	2.72617	0.449727
	0.172917	0.680219
	0.597162	0.724261
	1.30337	1.13533
	0.47046	1.35065
	2.14459	3.51365
	1.84341	0.724261
	1.16317	0.368492
	0.768521	1.83023
	1.06451	1.3115
	0.908725	3.3962
	1.29299	0.465387
	1.11643	0.543196
	0.31364	1.04724
	0.664667	1.28214
	0.591969	1.03746
	2.25883	0.70958
	0.409705	0.924901
	1.24106	0.213853
	0.39205	1.8547
	0.419052	1.26702
	1.88495	0.649089
	1.7084	0.789292
	0.287676	1.13201
	1.6357	1.89534
	1.10605	0.934688
	1.38645	0.362971
	0.369202	3.15198
	0.0343758	0.438265
	0.695823	0.86199
	0.159936	0.908725
	0.602355	0.649089
	0.66986	0.836027
	0.7841	1.90573
	1.41242	2.44057
	0.934688	0.768521
	1.01258	1.25664
	1.23067	0.517194
	0.209786	1.54743
	0.42061	1.74475
	1.59416	0.638704
	0.965845	1.80706
	1.26702	0.504212
	1.39684	1.67205
	0.581584	3.18833
	1.72398	1.15278
	1.72398	0.545235
	0.0747751	1.74475
	0.534849	0.232114
	0.231076	2.07189
	0.872376	1.72398
	0.162532	0.312601
	1.55781	0.170321
	0.654282	1.01258
	0.415936	1.01777
	1.04893	3.7751
		0.986615
		0.721787
		0.51304
		0.633511
		0.33493
		2.25364
		0.825641
		1.86938
		0.654282
		0.506289
		1.1424
		1.15278
		0.15682
		0.21394
		0.560813
		0.550428
		0.227441
		0.685438
		0.778907
		1.23587
		1.08528
		0.965845
		0.649089
		1.68763
		1.19952
		0.763329
		1.56301
		0.42009
		0.898339
		1.93169
		0.789292
		0.680245
		0.623125
		0.318833
		0.203035
		0.908725
		0.278329
		1.59416
		0.444496
		0.659474
		1.62013
		0.7841
		1.03335
		0.934688
		2.85599
		3.28179
		0.591969
		1.32414
		1.47992
		0.239384
		2.15498
		1.46954
		1.32414
		0.659474
		1.38126
		0.374914
		1.91092
		1.02816
		1.41761
		1.46954
		2.5652
		1.94207
		2.30037
		0.597162
		0.468902
		0.680245
		1.11643
		2.83522
		0.495904
		0.361413
		1.39684
		0.345835
		1.23587
		1.40723
		2.12901
		0.238865
		0.426322
		2.44057
		1.28779
		0.597162
		0.393608
		0.545235
		1.1424
		0.706209
		0.310005
		0.437226
