# Supplementary material for: Tgif1-deficiency impairs cytoskeletal architecture in osteoblasts by activating PAK3 signaling
Source: eLife. 2024 Apr 25;13:RP94265. doi: 10.7554/eLife.94265 (PMC11045221; doi:10.7554/eLife.94265)
Supplement: Figure 2—source data 1. [file elife-94265-fig2-data1.xlsx]

## Sheet: Fig 2D
	Tgif +/+	Tgif -/-
	0.614325	0.863066
	0.405292	0.389222
	0.195501	0.848112
	0.404515	0.87592
	0.245146	0.695263
	0.38578	0.639716
	0.744057	0.843416
	0.520699	0.782427
	0.256592	0.385097
	0.591764	0.259353
	0.300442	0.718125
	0.493919	0.545025
	0.235137	0.432429
	0.411331	0.69109
	0.255194	0.346891
	0.585473	0.443062
	0.362364	0.334178
	0.307418	0.508126
	0.40224	0.612501
	0.320977	0.54535
	0.320167	0.820125
	0.823838	0.617753
	0.622408	0.849211
	0.32736	0.687826
	0.51208	0.871679
	0.244039	0.710907
	0.570055	0.705042
	0.318751	0.627007
	0.618219	0.658549
	0.363262	0.715763
	0.482778	0.563182
	0.413965	0.768575
	0.279956	0.824281
	0.331664	0.817796
	0.655464	0.67861
	0.351576	0.783961
	0.354891	0.645886
	0.28681	0.652454
	0.416303	0.765234
	0.342718	0.821919
	0.463619	0.44955
	0.368324	0.915924
	0.26563	0.9131
	0.38908	0.836948
	0.276467	0.517507
	0.512605	0.868051
	0.70305	0.876828
	0.797422	0.595111
	0.670666	0.910946
	0.667516	0.937308
	0.480418	0.777318
	0.944965	0.670232
	0.945769	0.800719
	0.951927	0.798052
	0.612635	0.3098
	0.462562	0.307406
	0.614424	0.545958
	0.691069	0.632005
	0.673099	0.654987
	0.7321	0.898908
	0.69064	0.931738
	0.616891	0.849728
	0.674561	0.938512
	0.259759	0.785146
	0.410544	0.866701
	0.29354	0.791262
	0.415618	0.899825
	0.732737	0.823347
	0.406494	0.924348
	0.483851	0.903203
	0.271177	0.829608
	0.474712	0.768582
	0.595809	0.612623
	0.253553	0.872908
	0.488018	0.836462
	0.609401	0.893822
	0.360732	0.804918
	0.375225	0.905654
	0.716308	0.806046
	0.38202	0.783337
	0.473169	0.672161
	0.945778	0.707899
	0.95434	0.690432
	0.283074	0.852084
	0.788634	0.912448
	0.707838	0.816665
	0.372342	0.838267
	0.858264	0.616129
	0.617265	0.902185
	0.185882	0.860324
	0.39521	0.896479
	0.544063	0.916242
	0.849963	0.898892
	0.369299	0.889881
	0.858393	0.873785
	0.205237	0.78187
	0.72614	0.866671
	0.42146	0.519207
	0.357459	0.844129
	0.484791	0.910536
	0.842415	0.628874
	0.905876	0.546391
	0.894862	0.670335
	0.818989	0.690357
	0.849404	0.473199
	0.419595	0.873213
	0.823905	0.81566
	0.927032	0.832734
	0.651261	0.745875
	0.951945	0.919325
	0.667443	0.470723
	0.868622	0.823185
	0.845881	0.888802
	0.37128	0.859501
	0.303933	0.929774
	0.471829	0.887981
	0.930632	0.903319
	0.485118	0.80966
	0.417521	0.754338
	0.866013	0.715382
	0.630417	0.925601
	0.477358	0.751835
	0.518242	0.761182
	0.415336	0.770837
	0.665327	0.77991
	0.759255	0.703451
	0.630371	0.931868
	0.881485	0.70106
	0.428816	0.744801
	0.236839	0.82663
	0.557102	0.914593
	0.944573	0.596396
	0.285504	0.809224
	0.719366	0.913356
	0.770974	0.922213
	0.438147	0.740471
	0.478295	0.880797
	0.837634	0.900914
	0.360834	0.924189
	0.741001	0.935094
	0.897587	0.859328
	0.526083	0.89319
	0.816772	0.878311
	0.60736	0.872338
	0.921838	0.742048
	0.744854	0.6035
	0.938178	0.814529
	0.897018	0.531959
	0.444934	0.858961
	0.696846	0.570342
	0.523988	0.947132
	0.370398	0.918092
	0.929929	0.747856
	0.902623	0.645909
	0.252614	0.751539
	0.920602	0.859824
	0.356005	0.791724
	0.947963	0.897387
	0.916407	0.915192
	0.782075	0.875755
	0.80597	0.878479
	0.898927	0.846464
	0.647291	0.775489
	0.909327	0.940849
	0.419775	0.824627
	0.888721	0.65655
	0.485921	0.843411
	0.855695	0.727523
	0.366275	0.877294
	0.789893	0.954374
	0.712497	0.876185
	0.653833	0.936942
	0.753139	0.756635
	0.392947	0.802014
	0.954046	0.380378
	0.81795	0.574423
	0.92696	0.719976
	0.729122	0.685623
	0.879373	0.657516
	0.849556	0.681262
	0.926771	0.62566
	0.89071	0.55661
	0.769998	0.746336
	0.896441	0.805715
	0.898291	0.782105
	0.44353	0.766722
	0.910942	0.653413
	0.762034	0.681416
	0.668445	0.444706
	0.93474	0.677922
	0.790261	0.777527
	0.811805	0.652214
	0.890908	0.316877
	0.777608	0.707826
	0.816566	0.702598
	0.697389	0.730356
	0.655245	0.792407
	0.840347	0.690353
	0.857139	0.749401
	0.794216	0.67832
	0.7567	0.451625
	0.570879	0.30147
	0.6715	0.741004
	0.475946	0.615823
	0.692354	0.701632
	0.784359	0.660943
	0.902791	0.783661
	0.90733	0.728864
	0.847348	0.703735
	0.779144	0.625578
	0.951263	0.745303
	0.675091	0.767083
	0.620601	0.365717
	0.672717	0.354854
	0.514676	0.526125
	0.689254	0.732635
	0.323489	0.300024
	0.7177	0.398853
	0.392301	0.825005
	0.355038	0.875675
	0.431521	0.772134
	0.476687	0.758862
	0.419215	0.234965
	0.214545	0.849029
	0.378868	0.366935
	0.243163	0.844876
	0.325694	0.720903
	0.386825	0.406561
	0.436673	0.787355
	0.431817	0.342261
	0.441137	0.399678
	0.427995	0.545118
	0.37613	0.292703
	0.452419	0.321883
	0.439318	0.623136
	0.416821	0.487375
	0.371562	0.365082
	0.480331	0.515684
	0.542084	0.760088
	0.537838	0.695195
	0.635427	0.720362
	0.535168	0.504382
	0.391364	0.752129
	0.401987	0.63686
	0.372647	0.79971
	0.447248	0.571974
	0.593761	0.688829
	0.474802	0.716017
	0.450808	0.732583
	0.582254	0.643702
	0.390148	0.411583
	0.508643	0.525463
	0.766647	0.473246
	0.424805	0.610536
	0.714467	0.523068
	0.728388	0.707405
	0.653216	0.483349
	0.718263	0.694368
	0.480056	0.720366
	0.651135	0.437364
	0.35873	0.450387
	0.473051	0.828465
	0.278887	0.536424
	0.365769	0.620325
	0.381455	0.594203
	0.513602	0.792907
	0.496269	0.403283
	0.366459	0.511574
	0.394925	0.5744
	0.510188	0.399446
	0.514586	0.419764
	0.396968	0.394669
	0.3134	0.794959
	0.33278	0.384595
	0.279383	0.66649
	0.358968	0.662426
	0.371922	0.641647
	0.325896	0.631968
	0.571898	0.64492
	0.455621	0.433695
	0.328699	0.413976
	0.29552	0.77782
		0.690516
		0.712415
		0.743013
		0.309322
		0.627773
		0.473945
		0.450996
		0.894716
		0.84586
		0.87239
		0.766868
		0.879072
		0.32009
		0.441231
		0.782369
		0.776369
		0.679301
		0.47916
		0.902592
		0.683972

## Sheet: Fig 2E
	Tgif +/+	Tgif -/-
	11	1
	6	1
	7	9
	3	2
	1	10
	10	1
	34	6
	15	1
	15	1
	9	9
	21	12
	1	5
	10	13
	20	28
	13	2
	20	12
	15	8
	25	13
	19	12
	21	12
	16	9
	18	14
	20	4
	19	19
	8	11
	41	34
	19	5
	13	11
	10	12
	26	1
	10	23
	11	11
	17	12
		26
		10
		11
	14	18
	5	11
	26	15
	8	11
	8	11
	9	9
	8	15
	31	11
	17	5
	18	5
	24	9
	10	1
	23	1
	4	12
	12	13
	12	12
	24	15
	9	2
	20	15
	19	3
	15	1
	8	1
	24	1
	16	1
	20	3
	13	19
	16	6
	14	2
	18	13
	12	31
	35	9
		12

## Sheet: Fig 2G
	scr	siTgif1
	0.26235	0.606174
	0.301028	0.500405
	0.354431	0.3847
	0.415631	0.323613
	0.320242	0.347718
	0.272424	0.332901
	0.41951	0.406251
	0.35614	0.884879
	0.269137	0.209948
	0.339992	0.195863
	0.328868	0.192844
	0.475112	0.417822
	0.392395	0.317969
	0.410582	0.862289
	0.25587	0.640757
	0.393806	0.889471
	0.355035	0.717454
	0.4103	0.784058
	0.31045	0.757501
	0.455303	0.869913
	0.317069	0.581213
	0.36066	0.595997
	0.475754	0.70853
	0.453348	0.656152
	0.727863	0.736062
	0.682302	0.399814
	0.600511	0.74274
	0.406919	0.668967
	0.499907	0.610716
	0.695318	0.549131
	0.430357	0.64834
	0.38766	0.568136
	0.464375	0.619296
	0.388086	0.732039
	0.549891	0.725327
	0.57584	0.538048
	0.762084	0.623155
	0.338768	0.44813
	0.651931	0.403328
	0.614182	0.482315
	0.478885	0.683204
	0.381896
	0.712215
	0.393716
	0.431174
	0.653455
	0.517029
	0.432059
	0.419942
	0.442531
	0.511517
	0.526144
	0.50455
	0.461061
	0.547001
	0.492123
	0.544977
	0.609077
	0.631223
	0.646197
	0.453836
	0.324611
	0.669433
	0.729542
	0.702484
	0.45877
	0.588241
	0.428596
	0.484163
	0.58259
	0.10687
	0.174844
	0.359559
	0.678783
	0.151515
	0.176633
	0.43802
	0.535065
	0.585403

## Sheet: Fig 2H
	scr	siTgif1
	14	11
	22	26
	29	20
	18	21
	13	17
	17	2
	3	14
	15	2
	14	5
	18	12
	13	14
	15	2
	31	3
	5	11
	3	6
	22	5
	12	2
	31	20
	11	11
	14	3
	25	9
	17	7
	9	10
	36	10
	8	12
	10	12
	9	12
	6	8
	11	6
	7	15
	12	14
	4	13
	23	12
	20	2
	18	20
	5	7
	4	3
	3	2
	9	8
	5	2
	17	14
	17	5
	16	2
	23	8
	10	6
	19	5
	11	1
	6	8
	22	8
	14	15
	6	8
	12	5
	9	6
	19	18
	17	16
	15	10
	23	2
	14	2
	21	26
	10	6
	17	37
	13	11
	12	7
	18	16
	22	2
	7	28
	20	24
	21	10
	24	14
	25	19
	15	20
	11	26
	24	22
	21	16
	9
	8
	16
	12
