# Supplementary material for: Tgif1-deficiency impairs cytoskeletal architecture in osteoblasts by activating PAK3 signaling
Source: eLife. 2024 Apr 25;13:RP94265. doi: 10.7554/eLife.94265 (PMC11045221; doi:10.7554/eLife.94265)
Supplement: Figure 3—figure supplement 2—source data 1. [file elife-94265-fig3-figsupp2-data1.xlsx]

## Sheet: Pak1
	scr			siTgif1
min	0	20	60	0	20	60
	0.97	1.17	1.15	1.35	0.84	0.98
	0.98	1.08	1.16	1.4	0.92	0.92
	1.05	1.19	1.03	1.46	0.88	1.04
	1.74	0.45	0.68	1.14	0.78	0.69
	0.91	0.56	0.55	0.8	0.48	0.56
	0.63	0.37	0.76	0.65	0.51	0.47
	1.29	0.45	0.4	1.01	0.65	0.9
	0.95	0.4	0.4	0.96	0.81	0.84
	0.82		0.34	1.01	0.64

## Sheet: Pak2
	scr			siTgif1
min	0	20	60	0	20	60
	1.07	0.9	1.09	1.23	0.96	0.93
	1.03	0.96	1.1	1.28	0.93	0.87
	0.9	1.07	1.04	1.19	0.92	0.79
	1.17	0.34	0.73	0.93	0.45	0.76
	1	0.71	0.57	0.74	0.88	0.41
	0.86	0.58	1.03	0.65	1.02	0.92
	1.15	0.83	0.55	0.78	0.73	1.14
	1.02	0.64	0.67	0.89	0.69
	0.86	0.54	0.54	0.7	0.35	0.76

## Sheet: Pak4
	scr			siTgif1
min	0	20	60	0	20	60
	1.11	1.48	1.59	1.25	0.76	0.88
	1.03	1.24	1.73	1.2	0.8	1.03
	0.87	1.39	1.47	1.19	0.95	1
		0.79	0.25	0.54	0.23	0.32
		0.69	0.38	0.5	0.22	0.4
	1	0.53	0.33	0.63	0.41
	1	0.96	0.44	0.73	0.65	0.62
	0.81	0.97	0.7	1.14	1.09	0.79
	1.24	0.47				0.4

## Sheet: Cdc42es2
	scr			siTgif1
min	0	20	60	0	20	60
	0.86	1.1	1.04	1.1	0.85	0.89
	1.07	1.09	0.88	1.14	0.84	0.85
	1.08	1.1	1.09	1.16	0.83	0.91
	1.04	0.72	0.72	1.01	0.85	0.74
	1.05	0.55	0.72	0.96	0.81	0.78
	0.92		0.72	0.96	0.8	0.78
	0.98	0.68	0.7	0.65	0.59	0.75
	1.03	0.81	0.76	0.62	0.69	0.82
	0.99	0.81	0.65	0.61	0.67	0.69

## Sheet: Cdc42ep1
	scr			siTgif1
min	0	20	60	0	20	60
	1.09	1.09	0.84	1.25	0.92	0.74
	0.89	1.11	0.76	1.3	0.9	0.65
	1.03	1.11	0.85	1.4	0.95	0.71
	1.18	0.84	0.24	0.31		0.33
	1.03	0.41	0.45	0.38		0.33
	0.83	0.23		0.45
	1.03	0.61	0.23	0.44	0.43	0.3
	1.22	0.57	0.21	0.33	0.39	0.32
	0.79	0.3	0.34	0.39	0.3	0.3

## Sheet: Cdc42ep2
	scr			siTgif1
min	0	20	60	0	20	60
	0.84	0.77	0.51	1.01	0.62	0.46
	1.14	0.79	0.51	0.97	0.66	0.49
	1.05	0.86	0.49	0.98	0.64	0.44
	1.06	0.6	0.6	0.71	0.57	0.42
	0.97	0.55	0.59	0.77	0.59	0.39
	0.97		0.56	0.7	0.57	0.36
	1	0.54	0.37	0.5	0.36	0.26
	1	0.58	0.35	0.51	0.35	0.27
	1.01	0.57	0.36	0.48	0.33	0.24

## Sheet: Cdc42ep4
	scr			siTgif1
min	0	20	60	0	20	60
	0.98	1.41		1.21	1.42	1.21
			1.68	1.42	1.14	1.26
	1.02	1.22	1.23	1.25	1.24	1.02
	0.73	1.06	0.67	0.39	0.52	0.34
	1.16	1.08	0.49	0.63	0.29
	1.19	0.86	0.7	0.54	0.25	0.42
	1.08	1.02	0.9	0.98	0.96	0.89
	1	1.09	0.91	1.03	1.21	0.74
	0.92	1.12	0.67	0.86	1.1	0.84
