# Supplementary material for: Tgif1-deficiency impairs cytoskeletal architecture in osteoblasts by activating PAK3 signaling
Source: eLife. 2024 Apr 25;13:RP94265. doi: 10.7554/eLife.94265 (PMC11045221; doi:10.7554/eLife.94265)
Supplement: Figure 3—source data 1. [file elife-94265-fig3-data1.xlsx]

## Sheet: Fig 3A
	scr			siTgif1
min	0	20	60	0	20	60
	1.07	0.954265	0.844623	1.54746	1.05043	1.04407
	0.81	0.864458	0.647372	1.29834	1.11794	1.06369
	1.14	0.793497	0.989323	1.20017	1.16324	1.08961
	1.08881	0.289261	0.532298	2.31958	1.81454	4.47266
	0.918437	0.454156	0.439209	2.20948	1.70217	4.33708
	1.23779	0.298076	1.64085	1.86276	1.69696	3.40479
	0.80789	1.11782	2.17033	1.83303	4.41963	4.05654
	1.10137	1.31728		2.59571		4.311
	0.919061	1.1371		2.46542		2.65483
	0.987921			2.27485
	0.95706			1.66516
	1.33026			2.04954
	0.785461			1.68526

## Sheet: Fig 3C
	Tgif1+/+	Tgif1-/-
	1.50767e-05	8.5608e-06
	4.8416e-06	2.5204e-06
	1.1867e-06	2.99527e-05
	7.6899e-06	9.45047e-05
	7.88e-07	1.10948e-05
	4.0025e-06	1.02695e-05

## Sheet: Fig 3D
	PAK3		Neg. ctrl		RAR
	IgG	Tgif1	IgG	Tgif1	IgG	Tgif1
	1.08125	8.44672	0.865837	1.43824	0.675858	2.22704
	0.918752	6.81828	1.13416	1.27078	1.32414	1.71652
	1.02562	1.28629	0.979323	2.28588	0.941148	1.37422
	0.974379	1.38972	1.02068	1.12244	1.05885	1.96134
	0.901102	4.4562	1.00336	1.00078	1.10371	2.61433
	1.0989	4.06241	0.96614	1.67898	0.896293	2.88045
	0.886927	2.91326	1.36927	1.00117	1.24391	1.72657
	0.958816	1.15426			0.855808	5.58526
					0.900281	4.44145

## Sheet: Fig 3E
	scr		siTgif1
	EV	PAK3 prom	EV	PAK3 prom
	0.15	0.56	0.1	0.84
	0.11	0.7	0.09	0.91
	0.16	0.58	0.09	0.8
	0.11	0.73	0.1	0.93
	0.0599185	0.420212	0.091781	0.737697
	0.0570463	0.44624	0.0910622	0.792727
	0.0736751	0.395812	0.090068	0.687613
	0.0674157	0.43111	0.0878528	0.655414
	0.304931	0.835737	0.48	1.03871
	0.324879	0.882359	0.464862	1.45099
	0.299398	0.822	0.49	1.04239
	0.317423	0.837996	0.45472	1.49466

## Sheet: Fig 3G
	scr	PAK3, scr	Tgif1, scr	PAK3, Tgif1
	0.32805	0.159558	0.696316	0.675268
	0.436891	0.167344	0.6844	0.50526
	0.420457	0.423149	0.707877	0.650485
	0.362378	0.429074	0.736775	0.618056
	0.360338	0.427603	0.764664	0.453886
	0.316673	0.376468	0.762722	0.287718
	0.288498	0.446384	0.590011	0.283694
	0.526776	0.417441	0.575526	0.486177
	0.331178	0.203369	0.766839	0.269966
	0.27763	0.28629	0.483659	0.343029
	0.518983	0.354013	0.28884	0.275806
	0.402982	0.501763	0.345594	0.321866
	0.281008	0.302437	0.567415	0.263993
	0.280862	0.279466	0.743207	0.199263
	0.418853	0.333529	0.638611	0.525198
	0.325919	0.231674	0.515035	0.480005
	0.472563	0.37306	0.521682	0.631479
	0.441243	0.384378	0.494943	0.37677
	0.40966	0.194333	0.656444	0.548191
	0.2725	0.234944	0.529373	0.650168
	0.47302	0.239842	0.613726	0.639722
	0.450902	0.295435	0.722959	0.549205
	0.374768	0.350218	0.662624	0.429696
	0.292165	0.434987	0.697909	0.509183
	0.313037	0.288835	0.737414	0.333124
	0.322288	0.292877	0.363343	0.578219
	0.474525	0.353348	0.327975	0.554426
	0.370465	0.5386	0.411121	0.741211
	0.48581	0.390406	0.603951	0.724132
	0.416329	0.307579	0.700674	0.527678
	0.430882	0.313185	0.392537	0.609364
	0.3728	0.311079	0.377185	0.507721
	0.404222	0.191245	0.491292	0.50658
	0.372269	0.2246	0.500336	0.394068
	0.307511	0.400539	0.496257	0.425382
	0.341598	0.51799	0.381692	0.700702
	0.454378	0.366993	0.500338	0.302618
	0.288704	0.325555	0.436427	0.421602
	0.472355	0.34725	0.479906	0.391605
	0.327322	0.342333	0.565706	0.368077
	0.466183	0.44745	0.710236	0.511028
	0.451588	0.302322	0.639151	0.483749
	0.337074	0.231582	0.36909	0.43482
	0.272335	0.319736	0.502593	0.243749
	0.32731	0.439966	0.516164	0.360486
	0.341614	0.334181	0.758735	0.383373
	0.375524	0.203099	0.424268	0.297731
	0.383174	0.347432	0.498685	0.42413
	0.388638	0.346571	0.726833	0.465725
	0.339123	0.391373	0.600564	0.377543
	0.419177	0.347499	0.65597	0.459239
	0.402904	0.370234	0.416859	0.549608
	0.27324	0.512977	0.499855	0.521596
	0.281472	0.313789	0.32373	0.336803
	0.391728	0.291659	0.389671	0.402099
	0.436998	0.31135	0.44513	0.292681
	0.456189	0.483286	0.528949	0.535001
	0.388909	0.176375	0.524107	0.445236
	0.302978	0.203187	0.512405	0.220809
	0.297427	0.267148	0.431646	0.511359
	0.40934	0.225079	0.643489	0.212898
	0.457653	0.297717	0.666045	0.637455
	0.341084	0.315897	0.52939	0.41716
	0.481939	0.336817	0.465762	0.42148
	0.362939	0.240558	0.352352	0.637982
	0.545698	0.367679	0.461812	0.372998
	0.372057	0.27404	0.461645	0.368422
	0.601338	0.375486	0.417262	0.31498
	0.440731	0.329655	0.299201	0.363965
	0.565025	0.380168	0.35633	0.382581
	0.558079	0.339725	0.483199	0.631238
	0.572041	0.2665	0.508436	0.302764
	0.364044	0.337418	0.458742	0.367411
	0.542384	0.340775	0.45395	0.376345
	0.78627	0.36719	0.315893	0.32279
	0.782822	0.230179	0.414559	0.403044
	0.416331	0.258804	0.233599	0.132555
	0.361283	0.370337	0.475731	0.136033
	0.532636	0.261028	0.375543	0.285596
	0.75887	0.127361	0.389741	0.378649
	0.73251	0.303192	0.376809	0.476967
	0.394974	0.292978	0.356944	0.463477
	0.363778	0.186413	0.298679	0.520105
	0.593304	0.250298	0.274898	0.49374
	0.329929	0.231833	0.309547	0.417145
	0.327462	0.256265	0.73851	0.350055
	0.763698	0.324238	0.269564	0.343383
	0.617468	0.112374	0.350664	0.570909
	0.407286	0.261095	0.309437	0.338659
	0.360486	0.293123	0.461107	0.511812
	0.709078	0.311706	0.713596	0.51505
	0.336408	0.344016	0.700316	0.364537
	0.467919	0.280558	0.658125	0.355734
	0.560406	0.183968	0.686769	0.25504
	0.605041	0.346274	0.244061	0.465161
	0.427063	0.186588	0.625305	0.40664
	0.500786	0.332226	0.710328	0.254872
	0.420688	0.348297	0.526054	0.323818
	0.591761	0.285465	0.654698	0.504467
	0.459451	0.287827	0.402238	0.441387
	0.382395	0.321879	0.705275	0.437308
	0.295546	0.467296	0.623442	0.306947
	0.369959	0.370733	0.710724	0.52241
	0.455151	0.26399	0.617897	0.279153
	0.338948	0.173213	0.485314	0.199024
	0.428831	0.500198	0.291789	0.253915
	0.312662	0.288963	0.352294	0.335154
	0.462782	0.446817	0.435507	0.622855
	0.446286	0.366015	0.328739	0.440737
	0.4466	0.469731	0.714739	0.415864
	0.472026	0.254426	0.416711	0.509963
	0.346396	0.325387	0.397693	0.335806
	0.24956	0.233044	0.50232	0.251125
	0.567528	0.617249	0.540119	0.366391
	0.228607	0.360795	0.306842	0.573865
	0.317598	0.534465	0.509487	0.479673
	0.338818	0.230782	0.475526	0.648689
	0.281549	0.487121	0.551796	0.340324
	0.281871	0.409283	0.586854	0.223005
	0.670312	0.244207	0.441478	0.239733
	0.212767	0.235693	0.301347	0.201224
	0.478302	0.227359	0.351819	0.189324
	0.543254	0.178937	0.31653	0.179876
	0.46137	0.248016	0.441216	0.153127
	0.270544	0.347302	0.29014	0.271861
	0.377259	0.20286	0.498675	0.126638
	0.387834	0.34863	0.351776	0.158524
	0.290332	0.339959	0.494939	0.310122
	0.463055	0.396526	0.461485	0.207091
	0.279473	0.186746	0.396364	0.179972
	0.398967	0.315606	0.401392	0.279651
	0.477264	0.571902	0.421361	0.309382
	0.31647	0.215425	0.567485	0.313237
	0.487133		0.293924	0.264133
	0.412327		0.245207	0.242154
	0.352904		0.270491	0.341521
	0.30638		0.388584	0.32785
	0.281663		0.560405	0.432722
	0.490505		0.501383	0.648662
	0.240597		0.233402	0.536654
	0.519803		0.530302	0.320167
	0.324971		0.314663	0.20198
	0.402411		0.320206	0.440259
	0.289395		0.359612	0.496904
	0.401997		0.289199	0.488005
	0.469106		0.339078	0.571776
	0.518812		0.274116	0.687451
	0.370041		0.45359	0.279799
	0.556734		0.461518	0.29338
	0.432706		0.719392	0.348946
	0.266565		0.426338	0.283732
	0.231031		0.612464	0.34507
	0.358132		0.469611	0.494271
	0.270085		0.345045	0.243716
	0.50945		0.227452
	0.562494		0.378344
	0.198687		0.379582
	0.288599		0.313929
	0.230898		0.258901
	0.394331		0.350444
	0.375048		0.402339
	0.344498		0.300857
	0.329267		0.353939
	0.261056		0.321129
	0.405267		0.405897
	0.144187		0.364031
	0.196639		0.531048
	0.222605		0.350922
	0.283448		0.304862
	0.347049		0.397495
	0.273026		0.301907
	0.288163		0.34622
	0.380072		0.28413
	0.279467		0.335769
	0.344625		0.345062
	0.271578		0.390602
	0.395661		0.290913
	0.426806		0.266741
	0.343851		0.444863
	0.313996		0.280194
	0.473532		0.294593
	0.364479		0.28326
	0.388332		0.273586
	0.443348		0.442938
	0.163936		0.217011
	0.330847		0.380016
	0.354556		0.293422
	0.233664		0.335847
	0.152881		0.522693
	0.184651		0.367672
	0.177615		0.300001
	0.285414		0.23913
	0.297806		0.312787
	0.320031		0.329499
	0.310818		0.565102
	0.431931		0.209502
	0.266529		0.662106
	0.33893		0.291995
	0.208994		0.442036
	0.219788		0.311883
	0.258352		0.390918
	0.303664		0.479132
	0.330923		0.393779
	0.412526		0.378862
	0.320668		0.377564
	0.394818		0.265746
	0.321886		0.366542
	0.503326		0.295693
	0.563629		0.527795
	0.210879		0.417182
	0.559254		0.401713
	0.247847		0.402583
	0.298017		0.395789
	0.253869		0.274863
	0.538205		0.392056
	0.505013		0.224023
	0.422486		0.281025
	0.385336		0.508484
	0.483617		0.597239
	0.454559		0.545599
	0.173739		0.617959
	0.257494		0.277904
	0.359204		0.396328
	0.497115		0.500766
	0.265955		0.634707
	0.346625		0.828254
			0.621431
			0.610394
			0.405206
			0.497442
			0.310124
			0.659249
			0.462708
			0.395818
			0.379748
			0.468175
			0.483016
			0.545804
			0.300355
			0.31277
			0.444397
			0.422578
			0.385197
			0.661055
			0.459923
			0.322451
			0.427898

## Sheet: Fig 3H
	scr	PAK3, scr	Tgif1, scr	PAK3, Tgif1
	15	14	14	25
	16	12	2	10
	15	10	3	24
	25	5	17	19
	12	9	9	19
	16	15	10	9
	18	14	19	11
	21	14	7	13
	13	13	5	1
	18	26	24	11
	19	23	8	14
	15	29	9	12
	6	13	17	26
	5	11	9	8
	11	22	16	4
	21	13	11	16
	9	27	7	19
	29	14	21	22
	21	9	8	13
	9	31	20	30
	28	15	4	25
	10	14	16	23
	21	14	5	9
	7	36	19	11
	10	25	5	13
	9	31	3	8
	3	27	11	13
	31	9	18	11
	15	15	6	22
	18	17	18	11
	18	15	12	17
	7	15	5	25
	1	10	11	9
	21	23	7	12
	22	17	10	5
	4	26	3	17
	5	8	4	33
	25	13	3	10
	8	16	10	13
	15	16	18	2
	22	15	18	8
	22	18	2	9
	18	18	3	15
	10	16	2	10
	6	11	6	2
	16	18	11	17
	14	8	2	12
	29	16	1	8
	6	11	5	5
	6	12	1	12
	7	11	21	14
	24	17	1	15
	10	16	2	15
	14	3	1	9
	14	7	25	20
	4	9	2	13
	7	12	3	5
	2	17	4	11
	7	21	6	18
	38	14	8	19
	2	20	5	3
	23	15	2	17
	18	16	16	9
	31	29	24	12
	4	26	16	10
	10	13	3	12
	2	17	1	13
	24	8	2	7
	15	16	4	15
	12	16	3	14
	18	16	5	12
	14	17	2	18
	25	21	2	18
	4	11	4	26
	6	17	1	4
	19	18	1	20
	4	15	4	6
	11	15	3
	2	12	2
	16	13	4
	10	6	11
	8	33
	17	12
	4
