# Supplementary material for: Tgif1-deficiency impairs cytoskeletal architecture in osteoblasts by activating PAK3 signaling
Source: eLife. 2024 Apr 25;13:RP94265. doi: 10.7554/eLife.94265 (PMC11045221; doi:10.7554/eLife.94265)
Supplement: Figure 4—source data 1. [file elife-94265-fig4-data1.xlsx]

## Sheet: Fig 4A
min	0	20	60
	0.97	1.62	1.99
	0.98	1.43	2.35
	1.06	1.72	2.06
	1.01	1.45	2.35
	1.01	1.54	2.67
	0.99	1.59	1.71
	0.95	1.17	2.2
	1.08	1.25	1.98
	0.97	1.26

## Sheet: Fig 4C
min	0	20	60
	1.03	1.24	2.65
	0.99	1.36	2.53
	0.99	1.26	2.43
	1.1	1.15	2.12
	0.88	1.15	2.14
	1.03		2.02
	1	1.09	1.95
	1	1.06	1.89
	1	1.03	1.86
	0.87	1.05
	1.08	1.38
	1.07	1.42

## Sheet: Fig 4E
	DMSO			ActD
min	0	20	60	0	20	60
	1.14	1.13	0.99	0.74	0.31	0.37
	0.91	1.31	1.43	0.68	0.38	0.86
	0.96	1.09	1.32	0.6	0.6	0.78
	1	0.8	1.53	1.46	1.02	0.94
	1.03	1.18	1.21	1.12	0.94	0.93
	0.97	1.03	2.39	1.04	0.86	0.85
	0.98	1.32	2.1	1.3	0.82	0.88
	1.01	1.52	2.27	1.08	2.01	0.73
	1	1.44	1.67	1	2.02	0.68
	0.97	1.92	1.54	1.07	2.05	1.1
	1.04	1.85	1.51	1.08
	1	1.29	1.96
	0.86	1.43	1.95
	1	1.38	1.74
	1.16	1.41	1.73
	0.87	1.48	1.65
	1.08	1.68	1.82
	1.07	1.05	1.31
	0.92	1.38	1.94
	1.06	1.42	2.11
	1.02	1.46
		1.88
		1.33

## Sheet: Fig 4G
	DMSO			ERK 1/2 inhibitor
Time	0	20	60	0	20	60
	0.87	1.29	1.79	1	0.77	1.69
	1.16	1.43	2.05	0.95	0.93	1.62
	0.99	1.38	1.87	1.02	0.97	1.64
	0.86	1.41	1.48	0.88	0.95	1.81
	1	1.48	1.55	0.84	0.95	1.95
	1.16	1.68	1.45	0.9	0.93	1.94
	0.87	1.05	1.92	0.93	0.78	1.81
	1.08	1.38	1.8	1.05	1.02	1.9
	1.07	1.42	1.8	1.04	1	1.95
	0.92	1.46	2.33	0.8	1	1.1
	1.06	1.88	2.26	0.86	0.95	1.24
	1.02	1.33	2.06	0.84	1.01	1.28

## Sheet: Fig 4H
Promoter	2.2 kb		1.7 kb		1.2 kb		0.5 kb
Min	0	60	0	60	0	60	0	60
	1.01443	1.47158	1.00909	1.83025	1.04559	1.83321	1.01948	1.29302
	0.985571	1.57776	0.990912	1.9142	0.954408	1.81396	0.980515	1.27016
	1.16148	1.47876	1.14626	1.93857	1.21474	1.81149	1.01126	1.2971
	0.838523	1.85759	0.853741	2.03646	0.785261	1.8207	0.98874	1.46533
	1.06753	1.25239	1.05995	1.17869	1.0371	1.15844	1.04154	0.88513
	0.932467	1.12306	0.940048	1.28596	0.962903	1.16827	0.958462	0.873945
	1.1017	1.2067	1.24599	1.4199	1.07496	1.129	1.09928	0.790696
	0.898298	1.10056	0.754005	1.15077	0.925042	1.16764	0.900717	0.994238
	1.01598	1.83	1.02275	1	1.02789	0.82	0.972107	0.95
	0.984022	1.14	0.97725	1.07		0.69	0.973751	0.99
	1.02625	1.65		1.1		0.78		1.03
		1.26		1.04		0.71		1.11
		0.982487		1.59699		1.45713		1.01335
		1.09732		2.47379		1.04462		1.16586
		0.929588		1.70475		1.32312		0.953963
		0.932085		2.63485		0.958448		1.1217
		1.88422				1.51
		1.56341
		1.83356
		1.57256
		1.89762
		1.52756
		1.72102
		1.47277
		1.6772
		1.07438
		1.08577
		1.12061
		1.08293
		1.063
		1.47757
		1.97519
		2.31553
		2.31641

## Sheet: Fig 4I
	0 min	60 min
	1.11815	1.55611
	1.00773	1.84125
	0.991229	1.44459
	0.882883	1.62173
	1.4061	1.50413
	1.37667	1.32269
	0.625668	1.54648
	0.591565	1.24506
	1.00058	1.04278
	0.999418	1.86058
		1.29402
		1.25935
		2.11861
		1.34953
		0.556145
		0.522468

## Sheet: Fig 4J
Min	0	20	60
	1.03	1.24	2.65
	0.99	1.36	2.53
	0.99	1.26	2.43
	1.1	1.15	2.12
	0.88	1.15	2.14
	1.03	1.09	2.02
	1	1.06	1.95
	1	1.03	1.89
	1	1.05	1.86
	0.87	1.38
	1.08	1.42
	1.07
