# Supplementary material for: Tgif1-deficiency impairs cytoskeletal architecture in osteoblasts by activating PAK3 signaling
Source: eLife. 2024 Apr 25;13:RP94265. doi: 10.7554/eLife.94265 (PMC11045221; doi:10.7554/eLife.94265)
Supplement: Figure 5—source data 1. [file elife-94265-fig5-data1.xlsx]

## Sheet: Fig 5B
	Tgif1 +/+	Tgif1 -/-
	0.438932	0.401508
	0.658137	0.346574
	0.496303	0.318554
	0.435145	0.278917
	0.35706	0.510948
	0.549762
	0.388512
	0.519758
	0.703606

## Sheet: Fig 5C
	Tgif1 +/+	Tgif1 -/-
	29.058	22.3301
	25.2373	21.3319
	37.4909	11.4872
	25.788	14.5235
	24.1209	22.7395
	37.646
	31.5193
	24.3495
	27.9206

## Sheet: Fig 5D
	Tgif1 +/+	Tgif1 -/-
	24.6498	15.6304
	18.4173	15.3474
	24.5057	7.6629
	19.3049	5.0026
	15.9522	7.1892
	31.6661
	23.8596
	16.0912
	18.4948

## Sheet: Fig 5E
	Tgif1 +/+	Tgif1 -/-
	32.0368	23.2406
	28.0169	22.911
	39.8701	11.773
	27.9971	15.2684
	24.8981	22.6268
	37.9629
	34.3198
	23.8852
	28.9781
