# Supplementary material for: Tgif1-deficiency impairs cytoskeletal architecture in osteoblasts by activating PAK3 signaling
Source: eLife. 2024 Apr 25;13:RP94265. doi: 10.7554/eLife.94265 (PMC11045221; doi:10.7554/eLife.94265)
Supplement: Figure 6—source data 1. [file elife-94265-fig6-data1.xlsx]

## Sheet: Fig 6B
	Tgif1+/+		Tgif1-/-
	veh	PTH	veh	PTH
	12.2824	6.84831	24.3114	12.9711
	29.1141	4.89737	22.9908	18.4966
	17.2869	7.30988	18.991	20.6727
	15.9851	7.07547	24.3527	7.51334
	8.29887	4.55963	13.1855	15.5637
	29.4843	6.02031	18.2792	5.98715
	18.319	6.96815	17.3391	15.1587
	14.4087	3.33201	28.6775	8.27488
	14.5882	9.00509		13.5533
	26.1738	5.67421		15.3951

## Sheet: Fig 6D
	Dmp1-cre-;Tgif1fl/fl		Dmp1-cre+;Tgif1fl/fl
	veh	PTH	veh	PTH
	15.32	5.36	26.92	10.11
	27.41	8.19	14.04	9.3
	23.06	10.48	27.26	15.33
	25.41	11.95	21.64	27.04
	14.42	17.18	27.25	23.13
	14.46	7.89	31.27	23.35
	13.22	16.61	27.31	23.05
	17.44	10.4	12.57	12.42
