# Supplementary material for: Tgif1-deficiency impairs cytoskeletal architecture in osteoblasts by activating PAK3 signaling
Source: eLife. 2024 Apr 25;13:RP94265. doi: 10.7554/eLife.94265 (PMC11045221; doi:10.7554/eLife.94265)
Supplement: Figure 7—source data 1. [file elife-94265-fig7-data1.xlsx]

## Sheet: Fig 7B
	scr		siTgif1
	veh	PTH	veh	PTH
	0.26235	0.421297	0.606174	0.484057
	0.301028	0.349986	0.500405	0.364808
	0.354431	0.276644	0.3847	0.369983
	0.415631	0.29906	0.323613	0.439937
	0.320242	0.401438	0.347718	0.689053
	0.272424	0.354456	0.332901	0.407688
	0.41951	0.336648	0.406251	0.482855
	0.35614	0.318045	0.884879	0.534593
	0.269137	0.0909092	0.209948	0.531987
	0.339992	0.234989	0.195863	0.548023
	0.328868	0.205602	0.192844	0.579584
	0.475112	0.131881	0.417822	0.541372
	0.392395	0.156206	0.317969	0.854425
	0.410582	0.114007	0.862289	0.861415
	0.25587	0.12712	0.640757	0.853416
	0.393806	0.167069	0.889471	0.522393
	0.355035	0.358773	0.717454	0.689692
	0.4103	0.50049	0.784058	0.570784
	0.31045	0.394994	0.757501	0.619498
	0.455303	0.312525	0.869913	0.372804
	0.317069	0.291122	0.581213	0.518795
	0.36066	0.450182	0.595997	0.586715
	0.475754	0.490634	0.70853	0.481913
	0.453348	0.373739	0.656152	0.73005
	0.727863	0.275677	0.736062	0.596659
	0.682302	0.397745	0.399814	0.441592
	0.600511	0.422084	0.74274	0.577837
	0.406919	0.334858	0.668967	0.535566
	0.499907	0.526443	0.610716	0.554242
	0.695318	0.584688	0.549131	0.675594
	0.430357	0.4445	0.64834	0.838831
	0.38766	0.315723	0.568136	0.486518
	0.464375	0.377718	0.619296	0.843117
	0.388086	0.413192	0.732039	0.823709
	0.549891	0.290097	0.725327	0.859829
	0.57584	0.329534	0.538048	0.760576
	0.762084	0.541837	0.623155	0.877612
	0.338768	0.33024	0.44813	0.802485
	0.651931	0.553968	0.403328	0.821083
	0.614182	0.192521	0.482315	0.479267
	0.478885	0.412677	0.683204	0.649366
	0.381896	0.444695		0.841108
	0.712215	0.508298		0.685105
	0.393716	0.449977		0.580521
	0.431174	0.500812		0.578469
	0.653455	0.442999		0.511126
	0.517029	0.432036		0.782042
	0.432059	0.347051		0.574196
	0.419942	0.434483		0.73383
	0.442531	0.468954		0.66887
	0.511517	0.42757		0.501138
	0.526144	0.591803		0.563147
	0.50455	0.403347		0.642028
	0.461061	0.451553		0.412611
	0.547001	0.364316		0.66758
	0.492123	0.453924		0.528017
	0.544977			0.555351
	0.609077			0.541988
	0.631223			0.742614
	0.646197			0.604133
	0.453836			0.4914
	0.324611			0.641759
	0.669433			0.662562
	0.729542			0.521085
	0.702484			0.511455
	0.45877			0.426438
	0.588241			0.496809
	0.428596			0.468104
	0.484163			0.560166
	0.58259			0.682651
	0.10687
	0.174844
	0.359559
	0.678783
	0.151515
	0.176633
	0.43802
	0.535065
	0.585403

## Sheet: Fig 7C
	veh	PTH
	1	0.519208
	1.01342	0.553521
	0.986762	0.441138
	1.36294	0.846841
	0.92317	0.848558
	0.794773	1.00314
	1	0.846842
	1.01342	0.848558
	0.986762	1.00314
	0.758167	0.436305
	1.35693	0.705263
	0.972024	0.67514

## Sheet: Fig 7F
	scr		siTgif1		siTgif1 + siPAK3
	veh	PTH	veh	PTH	veh	PTH
	0.26235	0.421297	0.606174	0.484057	0.558997	0.429962
	0.301028	0.349986	0.500405	0.364808	0.47613	0.311606
	0.354431	0.276644	0.3847	0.369983	0.447497	0.516093
	0.415631	0.29906	0.323613	0.439937	0.572143	0.354577
	0.320242	0.401438	0.347718	0.689053	0.262793	0.326752
	0.272424	0.354456	0.332901	0.407688	0.383804	0.419277
	0.41951	0.336648	0.406251	0.675594	0.458871	0.528662
	0.35614	0.318045	0.884879	0.482855	0.248513	0.287791
	0.269137	0.285351	0.591702	0.534593	0.331791	0.33221
	0.339992	0.321718	0.597394	0.531987	0.429422	0.280156
	0.328868	0.593421	0.843147	0.548023	0.430376	0.511493
	0.475112	0.531135	0.82586	0.579584	0.324644	0.536649
	0.392395	0.336516	0.817419	0.541372	0.389705	0.292693
	0.410582	0.419434	0.831827	0.854425	0.238709	0.5541
	0.25587	0.436711	0.605208	0.861415	0.341373	0.472047
	0.393806	0.592887	0.796785	0.853416	0.452331	0.407724
	0.355035	0.530961	0.820386	0.522393	0.438273	0.440992
	0.4103	0.454265	0.656752	0.689692	0.332051	0.396296
	0.31045	0.409165	0.699283	0.570784	0.35843	0.539111
	0.455303	0.544737	0.479539	0.619498	0.440023	0.464607
	0.317069	0.411447	0.551717	0.372804	0.622899	0.451253
	0.36066	0.472312	0.54867	0.518795	0.346355	0.42568
	0.453348	0.520686	0.775166	0.586715	0.48866	0.335482
	0.727863	0.396805	0.733936	0.481913	0.378264	0.334037
	0.682302	0.403324	0.789331	0.73005	0.469195	0.605017
	0.600511	0.423116	0.476555	0.596659	0.520672	0.45631
	0.406919	0.375177	0.390416	0.441592	0.446609	0.633877
	0.499907	0.327705	0.662096	0.577837	0.382056	0.36356
	0.695318	0.542201	0.502971	0.535566	0.557209	0.38797
	0.430357	0.455409	0.498327	0.838831	0.560098	0.489033
	0.38766	0.445021	0.519563	0.486518	0.372835	0.404358
	0.464375	0.402349	0.536217	0.843117	0.721161	0.437943
	0.388086	0.446793	0.317969	0.823709	0.477403	0.520443
	0.549891	0.568029	0.862289	0.859829	0.573864	0.490675
	0.57584	0.454589	0.640757	0.760576	0.468332	0.462235
	0.338768	0.532907	0.889471	0.877612	0.47907	0.407498
	0.651931	0.392648	0.717454	0.802485	0.448683	0.547045
	0.614182	0.472225	0.784058	0.821083	0.420441	0.596249
	0.478885	0.456504	0.757501	0.479267	0.319702	0.568532
	0.381896	0.439924	0.869913	0.649366	0.75299	0.510274
	0.712215	0.114007	0.581213	0.841108	0.500075	0.386689
	0.393716	0.12712	0.595997	0.685105	0.537268	0.42923
	0.431174	0.167069	0.70853	0.580521	0.357818	0.408577
	0.653455	0.234989	0.656152	0.578469	0.601843	0.622576
	0.517029	0.205602	0.736062	0.511126	0.558901	0.481586
	0.432059	0.131881	0.399814	0.782042	0.57437	0.537611
	0.419942	0.156206	0.74274	0.574196	0.539508	0.500751
	0.442531	0.453924	0.668967	0.73383	0.50332	0.576385
	0.511517	0.358773	0.610716	0.66887	0.473763	0.560132
	0.526144	0.50049	0.549131	0.501138	0.692035	0.441679
	0.50455	0.394994	0.64834	0.563147	0.418001	0.319878
	0.461061	0.312525	0.568136	0.642028	0.69372	0.630513
	0.547001	0.291122	0.619296	0.412611	0.536784	0.404801
	0.492123	0.450182	0.732039	0.66758	0.557164	0.410482
	0.544977	0.490634	0.725327	0.528017	0.481565	0.376886
	0.609077	0.373739	0.538048	0.555351	0.612151	0.516411
	0.631223	0.275677	0.623155	0.541988	0.487937	0.464272
	0.646197	0.397745	0.44813	0.742614	0.341282	0.502585
	0.453836	0.422084	0.403328	0.604133	0.509288	0.468407
	0.324611	0.334858	0.482315	0.4914	0.408282	0.61176
	0.669433	0.526443	0.683204	0.641759	0.388924	0.56352
	0.729542	0.584688	0.417822	0.662562	0.48774	0.37411
	0.702484	0.4445		0.521085	0.473745	0.418402
	0.45877	0.315723		0.511455	0.113842	0.262592
	0.588241	0.377718		0.426438	0.259762	0.200427
	0.428596	0.413192		0.496809	0.0807113	0.167848
	0.484163	0.290097		0.468104	0.162523	0.523451
	0.58259	0.329534		0.560166	0.173161	0.155688
	0.174844	0.541837		0.682651	0.118499	0.198069
	0.359559	0.33024		0.554242	0.133412	0.419695
	0.678783	0.553968			0.239059	0.165904
	0.176633	0.192521				0.163632
	0.43802	0.412677
	0.535065	0.444695
	0.585403	0.508298
	0.475754	0.449977
		0.500812
		0.442999
		0.432036
		0.347051
		0.434483
		0.468954
		0.42757
		0.591803
		0.403347
		0.451553
		0.364316
