# Supplementary figures and images for: Tgif1-deficiency impairs cytoskeletal architecture in osteoblasts by activating PAK3 signaling
Source: eLife journal article supplement (doi:10.7554/elife.94265), 2024-01-17

**B**

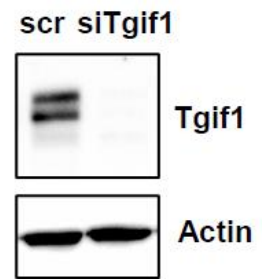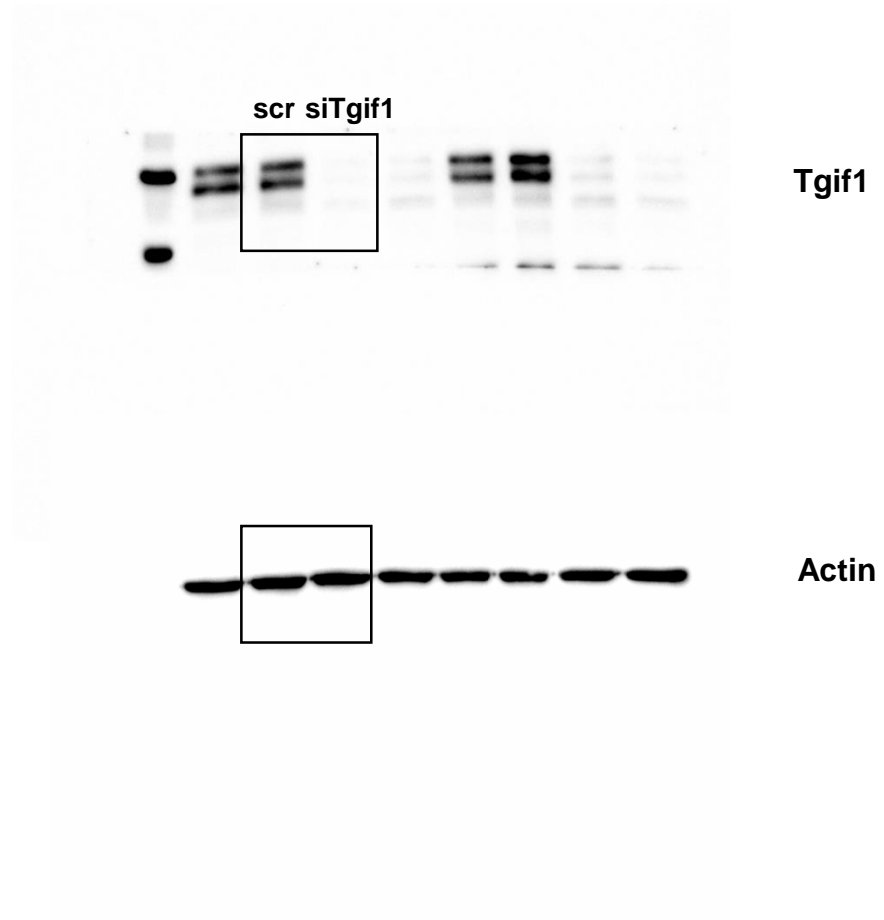

Figure 2- supplement 1

Supplement: fig2-figsupp1-data2 [file elife-94265-fig2-figsupp1-data2-v1.zip]

**B**

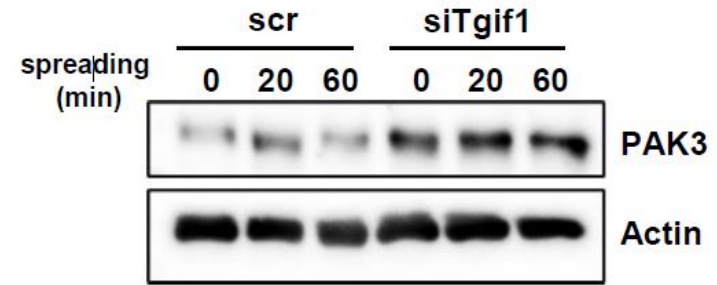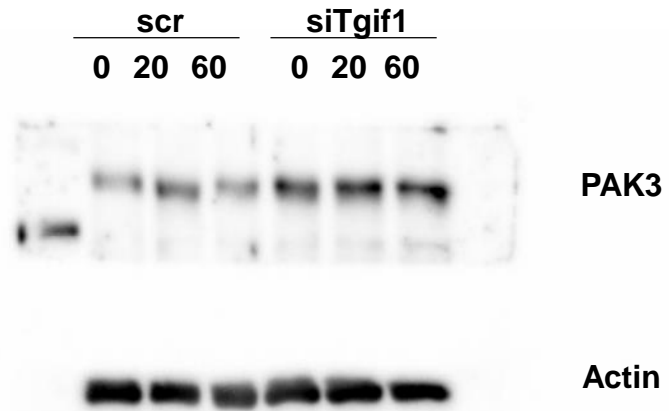

Figure 3B

Supplement: fig3-data3 [file elife-94265-fig3-data3-v1.zip]

**B**

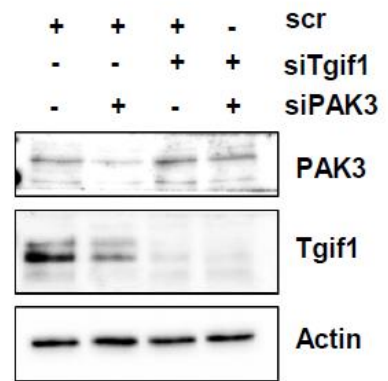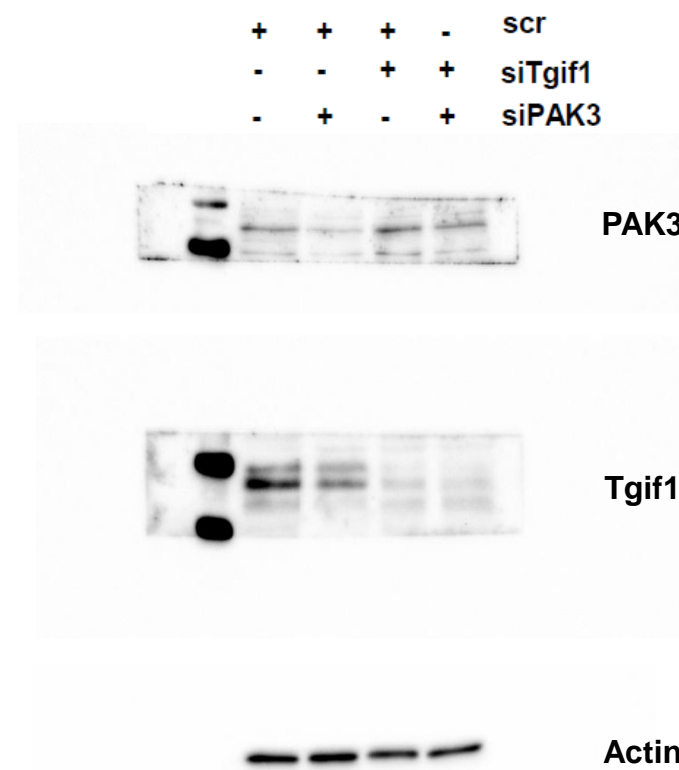

Figure 3- supplement 3

Supplement: fig3-figsupp3-data2 [file elife-94265-fig3-figsupp3-data2-v1.zip]

**B**

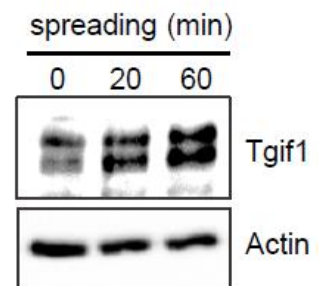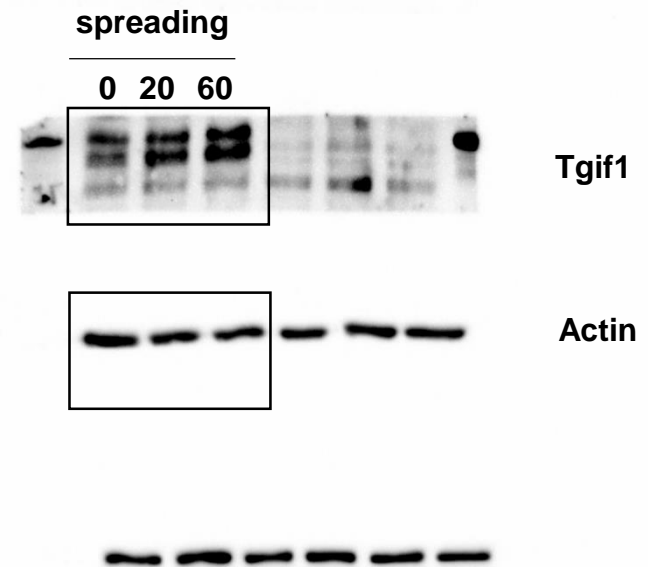

Figure 4B

Supplement: fig4-data3 [file elife-94265-fig4-data3-v1.zip]

**D**

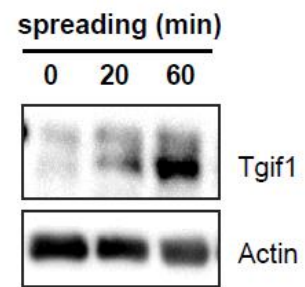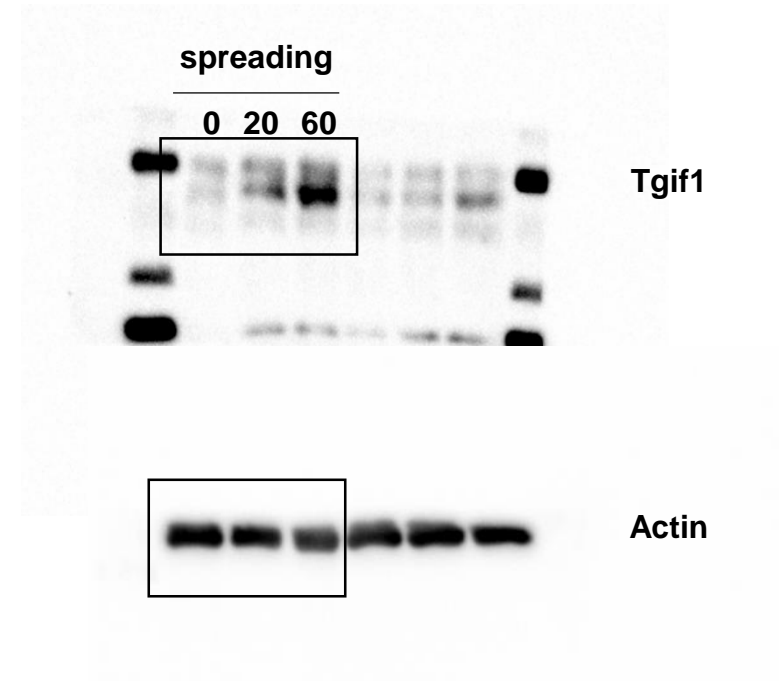

Figure 4D

Supplement: fig4-data5 [file elife-94265-fig4-data5-v1.zip]

**F**

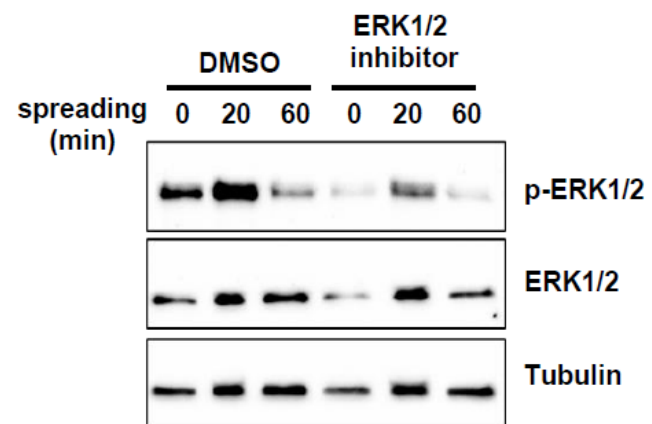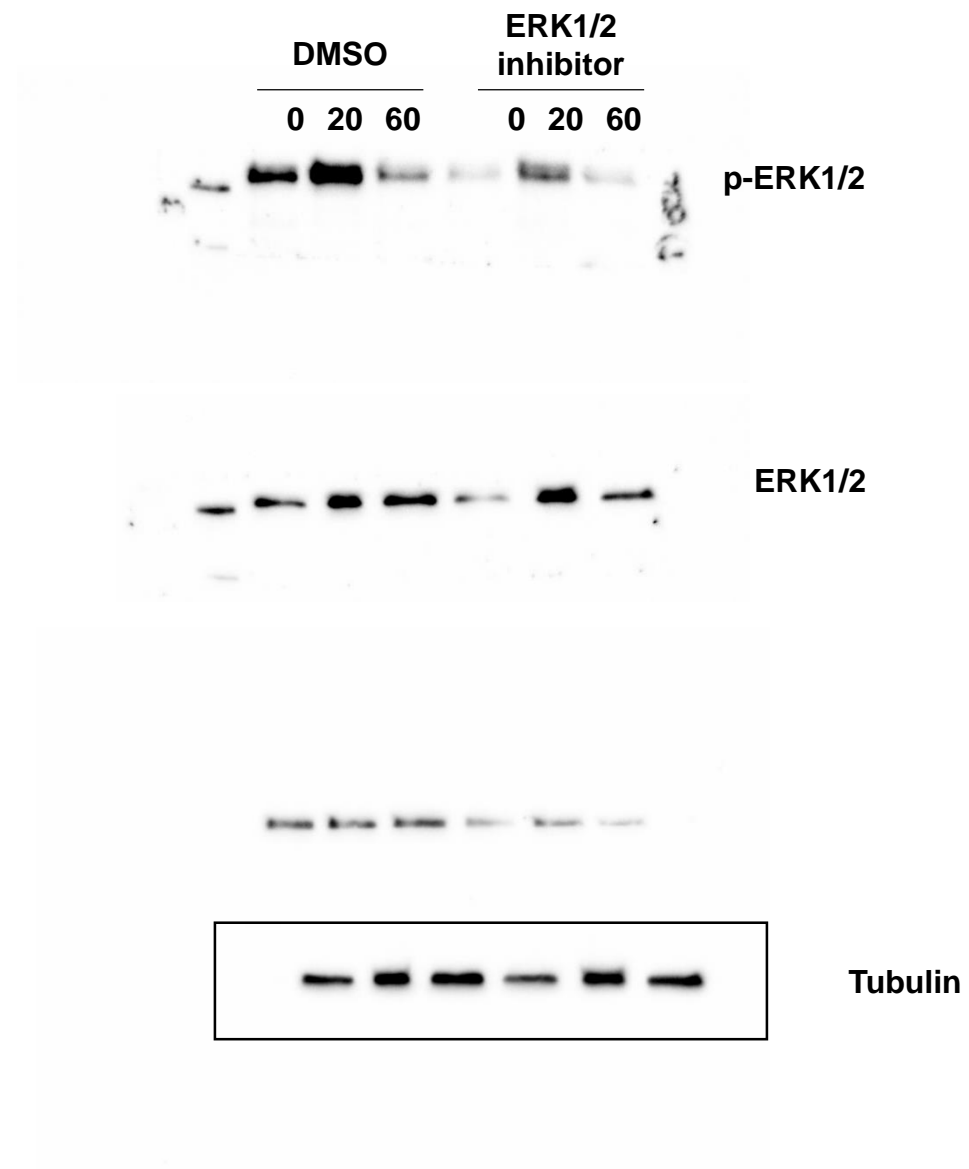

Figure 4F

Supplement: fig4-data7 [file elife-94265-fig4-data7-v1.zip]

D

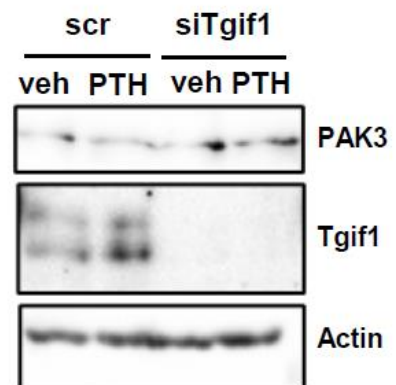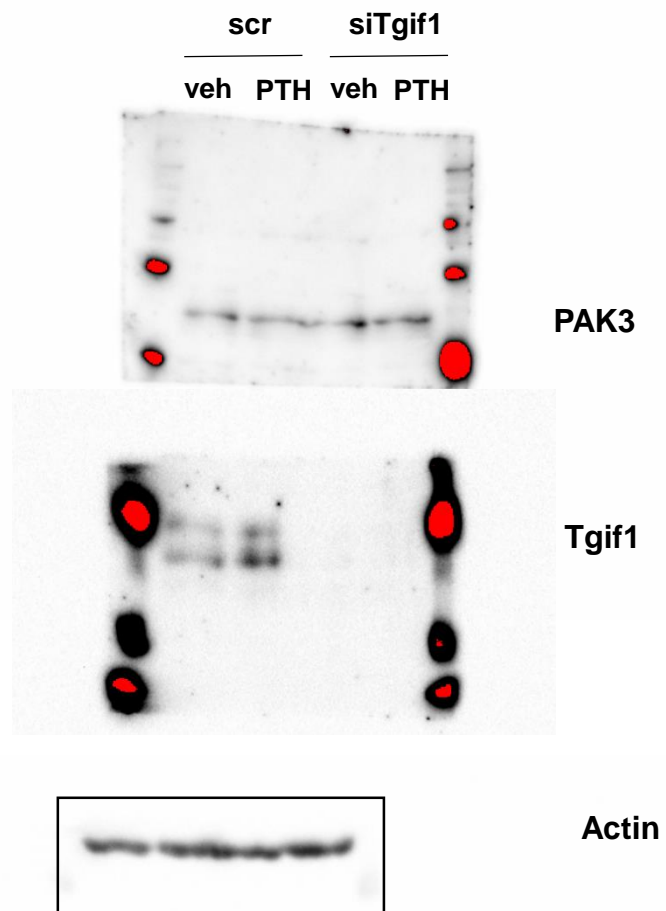

Figure 7D

Supplement: fig7-data3 [file elife-94265-fig7-data3-v1.zip]
